# Supplementary material for: Nucleosomes and DNA methylation shape meiotic DSB frequency in Arabidopsis thaliana transposons and gene regulatory regions
Source: HighWire-hosted journal article supplement (doi:10.1101/gr.225599.117), 2018-03-12
Supplement: Supplemental_Information.docx [file Supplemental_Information.docx]

Nucleosomes and DNA methylation shape meiotic DSB frequency in *Arabidopsis* transposons and gene regulatory regions

**CONTENTS**

Supplemental Methods and References

Supplemental Tables S1-S18

Supplemental Figures S1-S31

**SUPPLEMENTAL METHODS**

**Generation of *Arabidopsis* *SPO11-1-Myc* *spo11-1* lines**

Six copies of the c-Myc epitope were translationally fused to a genomic clone of the *SPO11-1* gene in the pPZP211 binary vector to generate pKH658 (pPZP211-SPO11-1::SPO11-1:6×Myc::NOS). The NOS terminator was cut from the 326-GFP plasmid by *Sac*I and *Eco*RI digestion, and sub-cloned into the pPZP211 multi-cloning sites. The 6×Myc DNA sequence was PCR amplified from the myc-pBA vector using primers myc-HB-F and myc-BglII-R. The PCR product was digested by *Bam*HI and *Bgl*II and cloned into the *Bam*HI site of the pPZP211-NOS vector. 3,735 bp of *SPO11-1* genomic DNA, including 1,087 bp of promoter sequence, was PCR amplified using primers SPO11-1-BamHI-F and SPO11-1-BamHI-R, and then cloned into the *Bam*HI site of vector pPZP211-6×Myc-NOS. Plasmid pKH658 was transformed into *Agrobacterium tumefaciens* strain GV3101 and this was used to transform wild type *Arabidopsis* (Col-0) using floral dipping. All primer sequences are provided in Supplemental Table S18.

T1 *SPO11-1-Myc* transformants were crossed with *spo11-1-3* (SALK_146172) (Hartung et al., 2007) heterozygotes. F1 plants were genotyped to identify *SPO11-1-Myc/+* *spo11-1-3/+* individuals using primers SALK-LBb1 and SALK172-R for the Salk insertion and primers KC286 and myc-BglII-R for the *SPO11-1-Myc* transgene. F2 plants from self-fertilized heterozygote F1 plants were genotyped using primers KC313 and KC314, which amplified specifically from the endogenous gene, but not the 6×Myc transgene, as they have different 3′ ends. Crosses from four independent T1 lines to *spo11-1-3* showed complementation of sterility in F2 *spo11-1* homozygotes. The *SPO11-1-Myc spo11-1-3* line was crossed to *met1-3* (Saze et al., 2003), or *prd2* (SAIL_94_D08) mutants. This *prd2* allele can be genotyped using primers SAIL_LB3+KC638 (T-DNA product, ~700 bp) and KC638+KC694 (wild type product, ~800 bp) (Supplemental Table S18). To detect SPO11-1-Myc, proteins were extracted from unopened buds of complementing F3 *SPO11-1-Myc spo11-1-3* plants by grinding in liquid nitrogen, followed by addition of protein extraction buffer (25 mM HEPES-NaOH pH 7.9, 5 mM EDTA, 1.2% SDS, 1 mM PMSF, 2 mM DTT, 1×Roche Complete Protease Inhibitor Cocktail), boiling for 5 minutes and centrifugation at 16,000*g* for 10 minutes. The protein extract was separated using SDS-PAGE and western blotting performed using mouse monoclonal c-Myc antibodies (910E) (sc-40, Santa Cruz) or c-Myc Antibody HRP conjugates (sc-40 HRP, Santa Cruz).

**Immunoprecipitation of SPO11-1-oligonucleotide complexes**

As *SPO11-1* is specifically expressed in meiocytes (Grelon et al., 2001), we collected unopened flower buds for extraction, which contain all stages of male and female meiosis. Approximately 30 grams of *SPO11-1-Myc spo11-1-3* floral buds were ground to a fine powder in liquid nitrogen and resuspended in 4 volumes of lysis buffer (25 mM HEPES-NaOH pH 7.9, 5 mM EDTA, 1.2% SDS, 1 mM PMSF, 2 mM DTT, 1×Roche Complete Protease Inhibitor Cocktail). The lysis solution was boiled for 20 minutes, followed by rapid chilling on ice. Centrifugation at 4,000*g* for 20 minutes at 4°C was performed twice and the final supernatant diluted 4 fold by adding 10 mM Tris-HCl pH 8.0, 150 mM NaCl, 1% Triton-X 100. 100 μg of c-Myc Antibody (9E10, sc-40, Santa Cruz) were added to the diluted extract (~160 ml) in 15 ml tubes and incubated for 8 hours at 4°C with rotation. 1.6 ml of 50% Protein G-Sepharose slurry (71-7083-00, GE Healthcare) was added and incubated overnight at 4°C with rotation. A mock control (no antibody) was performed to validate immunoprecipitation efficiency and specificity at small scale, using western blotting with mouse monoclonal c-Myc antibodies (9E10, sc-40, Santa Cruz), or c-Myc Antibody HRP conjugates (sc-40 HRP, Santa Cruz). Following immunoprecipitation, protein G beads were collected by centrifugation at 500*g* for 1 minute and washed five times with wash buffer (1% Triton X-100, 15 mM Tris-HCl, pH 8.0, 150 mM NaCl, 1 mM EDTA). Immunocomplexes were eluted from the Protein G beads by incubation at 70°C for 15 minutes in 2 volumes of elution buffer (100 mM Tris-Cl, 1 mM CaCl2, 10 mM EDTA, 0.5% SDS). 20 μg/ml of proteinase K was added to the beads and incubated at 50°C for 4 hours with occasional mixing. An equal volume of phenol/chloroform was added to beads, vortexed and centrifuged at 16,000*g* for 10 minutes. The supernatant was transferred to a fresh 1.5 ml tube and phenol/chloroform extraction was repeated. SPO11-1-oligos were precipitated using 0.1 volumes of 3 M sodium acetate pH 5.2, 7.5 μg of glycoblue (AM9515, Ambion) and an equal volume of isopropanol, followed by incubation at -80°C for 2 hours. SPO11-1-oligos were collected by centrifugation at 16,000*g* for 45 minutes at 4°C. After two 80% ethanol rinses the pellet was air-dried and resuspended in 30 μl of distilled water. 40 μl of 2×formamide loading buffer (80% deionized formamide, 10 mM EDTA, pH 8.0, 0.5 mg/ml xylene cyanol FF, 10% saturated bromophenol blue) were added, mixed and incubated at 70°C for 5 minutes. SPO11-1-oligonucleotides and a 20 bp ladder were separated using a 10% TBE-Urea gel (EC6875BOX, Invitrogen) and stained by SYBR® Gold Nucleic Acid Gel Stain (S-11494, Molecular Probes) for 3 minutes with gentle shaking. The gel region corresponding to 35–50 nt was excised, macerated and soaked in 10 mM Tris (pH 8.0) overnight at 37°C with rotation. The gel fragments were removed by SpinX-centrifuge tube filters (8163, Costar) and the eluate was transferred to fresh 1.5 ml tubes. 0.3 volume of 9 M ammonium acetate, 7.5 μg of glycoblue and 2.5 volumes of 100% ethanol were added, mixed and incubated at -80°C for 2 hours. The size-selected SPO11-1-oligonucleotides were centrifuged at 16,000*g* for 45 minutes as above, rinsed twice by 80% ethanol, air-dried and dissolved in 40 μl of distilled water.

For SPO11-1-oligo end-labeling experiments, a 50 μl aliquot of Protein G beads reserved from the immunoprecipitation was washed twice with 1×terminal deoxynucleotidyl transferase (TdT) buffer (50 mM potassium acetate, 20 mM Tris-acetate, 10 mM magnesium acetate, pH 7.9), and incubated with 15 units of TdT (M0315L, NEB), 50 μCi [α-32P]-dCTP triphosphate (5,000 Ci/mmol) and 5 μl of 10×TdT buffer, in a total volume of 50 μl, for 30 minutes at 37°C. The beads were washed three times with wash buffer. SPO11-1-oligo complexes were eluted by boiling for 3 minutes in 50 μl of 2×Laemmli buffer and separated using a 10% SDS-PAGE gel. The gel was vacuum-dried and radioactivity was detected by exposing to a phosphoimager screen.

**SPO11-1-oligonucleotide library construction**

Approximately 1 pmol of purified SPO11-1-oligos were used for GTP tailing at their 3′ ends. Conditions were used such that between 3 and 5 GMP residues were added per oligonucleotide. A 40 μl reaction was used containing 1×TdT buffer (50 mM potassium acetate, 20 mM Tris-acetate, 10 mM magnesium acetate, pH 7.9), 20 units of TdT (M0315L, NEB), and 2 mM GTP at 37°C for 6 hours. TdT was inactivated by incubating at 75°C for 10 minutes. The G-tailed oligonucleotides were precipitated by incubating with 2.5 volumes of 100% ethanol and 0.3 volumes of 9 M ammonium acetate at -80°C for 2 hours, followed by centrifugation at 16,000*g* for 45 minutes, washing twice with 80% ethanol, air-drying and resuspension in 20 μl of distilled water. G-tailed SPO11-1-oligos were ligated to a double-stranded DNA adapter in a 40 μl reaction of 1×T4 RNA ligase 2 buffer (50 mM Tris-HCl pH 7.5, 2 mM MgCl2, 1 mM DTT, 400 μM ATP), 10 pmol double-stranded 3′ adapter (3’-adapter: top strand, 5′-pTGGAATTCTCGGGTGCCAAGGddC-3′, bottom strand, 5′-AGCCTTGGCACCCGAGAATTCCACCC-3′) (Supplemental Table S18), and 20 units of T4 RNA ligase 2 (dsRNA ligase) (M0239L, NEB) overnight at room temperature. To synthesize complementary strands of SPO11-1-oligos, 30 μM dNTP and 10 units of Klenow polymerase (NEB) were added to the ligation reaction, incubated at 25°C for 15 minutes, followed by 70°C for 10 minutes. 0.3 volumes of 9 M ammonium acetate, 5 μg of glycoblue and 2.5 volumes of 100% ethanol were added, and DNA precipitated at -80°C for 2 hours, followed by centrifugation at 16,000*g*. The pellet was washed twice with 80% ethanol, air-dried and re-dissolved in 20 μl of water. 30 μl of formamide loading buffer was added, mixed and incubated at 70°C for 5 minutes. The denatured products were separated by electrophoresis using a 10% TBE-Urea gel, and the gel region between 60–80 nt (equivalent to 32–52 nt SPO11-1-oligonucleotides with (rG)3-5 tails and a ligated 23 nucleotide adapter) was excised, macerated and rotated overnight at 37°C overnight in 400 μl of 10 mM Tris-HCl, pH 8.0. The buffer containing dissolved SPO11-1-oligos was centrifuged through SpinX-centrifuge tube filters. 0.3 volumes of 9 M ammonium acetate, 10 μg of glycoblue, and 2.5 volumes of 100% ethanol were added and DNA was precipitated at -80°C for 2 hours, followed by centrifugation at 16,000*g* for 45 minutes. The pellet was washed twice with 70% ethanol and air-dried. The 3′-ends of gel-purified denatured DNA strands were tailed with GTP by dissolving the dried pellet in a 40 μl tailing reaction containing 1×TnT buffer, 30 units of TdT, and 50 μM GTP, then incubating at 37°C for 6 hours and at 70°C for 10 minutes. The G-tailed products were precipitated with 0.3 volumes of 9 M ammonium acetate, 10 μg of glycoblue, and 2.5 volumes of 100% ethanol at -80°C for 2 hours, followed by centrifugation at 16,000*g* for 45 minutes. After washing with 70% ethanol twice, the air-dried pellet was dissolved in 20 μl of distilled water and incubated in 40 μl of 1×T4 RNA ligase 2 buffer, 10 pmol double-stranded DNA adapter (5′ adapter: top strand, 5′-pATCGTCGGACTGTAGAACTCTGAAddC-3′. bottom strand, 5′-AGTTCAGAGTTCTACAGTCCGACGATCCC-3′) (Supplemental Table S18) and 30 units of T4 RNA ligase2 at room temperature overnight. Finally 30 μM dNTP and 10 units of Klenow polymerase were added and incubated at 25˚C for 15 minutes, followed by 70˚C for 10 minutes.

A test PCR was performed using a total reaction volume of 20 μl with 1/50 of the final Klenow reaction, 1×FailSafe™ PCR 2×PreMix E (FSP995E, Epicentre), 1μl of Pfu Ultra II Fusion HS DNA Polymerase (Catalog #600672, Agilent) and 1 μM primers RP1 and RPI1. The reaction mixture was divided into two tubes, and PCR performed at 94°C for 20 seconds, followed by 20 cycles of {94°C for 10 seconds; 60°C for 30 seconds; 72°C for 15 seconds}. 5 μl of the PCR products were separated using a 10% TBE gel (EC6275BOX, Invitrogen) alongside a PCR 20 bp low ladder (P1598, Sigma-Aldrich) and stained with SYBR gold to determine the size and quantity of PCR products. PCRs were then scaled up to a total volume of 400 μl. This mixture was divided into 10 μl aliquots, denatured at 94°C for 10 seconds and amplified for 16 cycles of {94°C for 10 seconds; 60°C for 30 seconds; 72°C for 15 seconds}. PCR products were pooled and precipitated using 0.3 volumes of 9 M ammonium acetate, 7.5 μg of glycoblue and 2.5 volumes of 100% ethanol. The PCR products were separated by electrophoresis using a 10% TBE gel, and the gel area corresponding to 160–180 bp was excised, macerated and soaked in 400 μl of 10 mM Tris, pH 8.0 at 37˚C overnight, with mixing. The eluate was spun through a SpinX-centrifuge tube filter and DNA was precipitated using 0.3 volumes of 9 M ammonium acetate, 7.5 μg of glycoblue and 2.5 volumes of 100% ethanol. The air-dried DNA pellet was dissolved in 30 μl of 10 mM Tris, pH 8.0. Sequencing of the completed SPO11-1-oligo library was then performed using an Illumina NextSeq instrument using either 50 or 75 cycle single-end sequencing.

**MNase and H3K4me3 chromatin immunoprecipitation sequencing**

Micrococcal nuclease digestion and sequencing library construction were performed as reported (Choi et al., 2016). For ChIP two grams of unopened floral buds were ground in liquid nitrogen. Nuclei were isolated and *in vitro* cross-linked in nuclear isolation crosslinking buffer (60 mM Hepes pH 8.0, 1 M sucrose, 5 mM KCl, 5 mM MgCl2, 5 mM EDTA, 0.6% Triton X-100, 0.4 mM PMSF, 1 ug pepstatin, 1×protein inhibitor cocktails, 1% formaldehyde) at room temperature for 25 minutes. Glycine was added to a final concentration of 125 mM and incubated for 25 minutes at room temperature with rotation. Cross-linked bud lysate was filtered through one layer of Miracloth and centrifuged at 2,000*g* at 4°C for 20 minutes. The pellet was resuspended in extraction buffer (0.25 M sucrose, 10 mM Tris-HCl pH 8.0, 10 mM MgCl2, 1% Triton X-100, 1 mM EDTA, 5 mM β-mercaptoethanol, 0.1 mM PMSF, 1×proteinase inhibitor cocktails) and centrifuged at 2,000*g* at 4°C for 15 minutes. The nuclei pellet was rinsed with 1 ml of TNE buffer (10 mM Tris-HCl pH 8.0, 10 mM NaCl, 1 mM EDTA, 1×proteinase inhibitor cocktails), resuspended and then centrifuged at 2,000*g* at 4°C for 5 minutes. Cross-linked chromatin was digested with 0.05 units of micrococcal nuclease (MNase, NEB M0247S) in reaction buffer (10 mM Tris-HCl, pH 8.0, 10 mM NaCl, 1 mM EDTA, 4 mM CaCl2) at 37°C for 15 minutes with vortexing. The reaction was stopped by adding EDTA to a final concentration of 20 mM, vortexing and placing on ice for 10 minutes. One volume of 10 mM Tris pH 8.0, 0.2% SDS, 2% Triton X-100, 0.2% sodium deoxycholate, 1×proteinase inhibitor cocktails was added and rotated for 2 hours at 4°C. The reactions were centrifuged at 14,000*g* in a microfuge for 5 minutes at 4°C. The supernatant was used for immunoprecipitation overnight at 4°C using Dynabeads Protein G that were pre-bound to 5 μg H3K4me3 antibody (ab8580 AbCam). The chromatin immunocomplexes were washed, eluted and reverse-crosslinked. The immunoprecipitates were further purified by phenol/chlorophorm/isoamyl alcohol (24:24:1) extraction, followed by ethanol precipitation and 2% agarose gel separation and gel extraction of ~145–150 bp DNA. Approximately 10 ng of ChIP-purified DNA was used to generate a library using the TruSeq Prep Kit v2 (Illumina). As a control for H3K4me3 ChIP-seq data we generated a library from genomic DNA extracted from the chromatin input for immunoprecipitation from Columbia wild type. As a control for MNase-seq we sequenced Columbia genomic DNA (gDNA) that had been extracted using CTAB and fragmented using dsDNA shearase, as described (Yelina et al., 2015). These control libraries were subjected to paired-end sequencing on an Illumina NextSeq 500 instrument. The genomic DNA library was also used as a control for SPO11-1-oligo analysis by using single-end reads trimmed to 50 bp.

**RNA sequencing**

Five μg of total RNA from unopened flower buds were extracted using Trizol reagent. To perform rRNA depletion we used the Ribo-Zero magnetic kit (MRZPL116, Epicentre). Fifty ng of rRNA-depleted RNA were used for RNA-seq library construction using the ScriptSeq v2 RNA-seq Library Preparation Kit (SSV21124, Epicentre). The library was amplified using 12 PCR cycles and indexed using ScriptSeq Index PCR Primers (RSBC10948, Epicentre) and FailSafeTM PCR Enzyme Mix (FSE51100). Sequencing was performed on an Illumina HiSeq instrument. RNA-seq data were analyzed using RSem (Li and Dewey, 2011).

**Bioinformatics analysis of SPO11-1-oligonucleotide data**

In many cases read lengths were longer than the SPO11-1-oligo insert between the sequencing adapters. In this case it was necessary to remove 3′-adapter sequences from the reads before alignment. SPO11-1-oligo FASTQ files were clipped for 3′-adapter sequences using the FASTX-Toolkit (version 0.0.13) function fastx_clipper (<http://hannonlab.cshl.edu/fastx_toolkit/>). Due to G-tailing prior to adapter ligation, we added 3×G 5′ to the clipped adapter sequence. Likewise, we trimmed bases from read 5′ ends to remove G residues added by G-tailing. Due to varying adapter lengths 5 bases were trimmed from RPI1 and RPI3 library reads, and 10 bases from all other libraries (Supplemental Table S18).

Trimmed reads were aligned to the TAIR10 reference sequence using Bowtie2 (version 2.2.9) (Langmead and Salzberg, 2012), with the following settings: --very-sensitive (-D 20 -R 3 -N 0 -L 20 -I S,1,0.50) -p 4 -k 10. Mapped reads were filtered for alignments with 2 or fewer mismatches using the SAM optional field “XM:i”. Alignments with the SAM optional field “XS:i” were dropped in order to obtain unique alignments. After plotting reads along the *Arabidopsis* chromosomes, we observed that some libraries contained narrow peaks with very high coverage values not observed in the other wild type replicate libraries (Supplemental Fig. S5). Based on their >1000 fold coverage compared with the mean, and library specificity, we concluded that these peaks most likely represent technical artifacts, potentially caused by PCR amplification (Supplemental Fig. S5A). Therefore, any identical reads were deduplicated using SAMtools (rmdup) (Li et al., 2009).

Multiple mapped reads were extracted using the SAM optional field “XS:i”. Up to 10 valid alignments were reported by Bowtie2, and any alignments with MAPQ scores less than 10 were discarded. As for uniquely aligning reads, SAMtools (version 1.3) rmdup was then used to remove duplicated reads. For the remaining multiple mapped reads, the alignment with the highest MAPQ score was retained, or if MAPQ scores were equal then one alignment was randomly chosen (‘best match’ method). We also investigated alternative mapping approaches for multiply aligning reads (Supplemental Figs. S5B-S5C). Fractional mapping was performed, whereby if a read had six valid alignments for example, a value of 1/6 was assigned to each position. We also used CSEM, which uses the local density of uniquely mapping reads to assign a fractional value to each multi-mapping position (Chung et al., 2011). We assessed these strategies by analyzing chromosomal distributions and frequencies within transposable elements (Supplemental Fig. S5C). For all subsequent analysis we used the ‘best match’ method.

BAM files for uniquely and multiply aligned reads were then combined and coverage calculated for each position in the genome. These coverage values were library size normalized using the sum of coverage of uniquely and multiply mapped reads. As a control we sequenced Columbia genomic DNA (gDNA) that had been extracted using CTAB and fragmented using dsDNA shearase, as described (Yelina et al., 2015). We aligned and processed gDNA single-end reads trimmed to 50 bp, as for SPO11-1-oligonucleotides. These data were used to calculate log2(SPO11-1-oligos/gDNA) values. Finally, z-score standardization was applied, such that scores represent the signed number of standard deviations from the mean value. This is calculated by subtracting the mean from log2(SPO11-1-oligos/gDNA) values and then dividing the difference by the standard deviation. These values were used for analysis of SPO11-1-oligo density along the chromosomes and in relation to specific genome annotations.

We used the ranger tool within the PeakRanger suite to identify regions of SPO11-1-oligo enrichment and summits in each wild type replicate library (Feng et al., 2011), providing the gDNA reads as a control for background in each case. False discovery rate (FDR) and *P*-value thresholds of ≤0.2 were applied because sampling of both signal and noise distributions is required to evaluate peak reproducibility during subsequent irreproducible discovery rate (IDR) analysis (Bailey et al., 2013). Hotspots were ranked by their -log10 transformed false discovery rate (FDR), and this ranking compared between the two most highly correlated replicates (RPI1 and RPI8) in order to give an irreproducible discovery rate (IDR). IDR analysis was performed using the Python package IDR (Li et al., 2011). High significance SPO11-1-oligo peaks are expected to have high consistency between replicates with regard to their ranking, which provides the basis for computing the IDR (Li et al., 2011). Peaks with IDR <0.05 were retained as high quality DSB hotspots and any overlapping hotspots were merged. This approach identified 5,914 hotspots genome-wide with a mean width of 823 base pairs. To analyze overlap of SPO11-1-oligo hotspots with sequence annotation features we performed permutation tests using the R package regioneR (Gel et al., 2016), based on the observed and expected number of overlapping loci genome-wide. Overlaps were defined as the number of SPO11-1-oligo hotspots that overlap one or more loci within a given category of annotation feature. For each analysis, 10,000 permutations were used for the per chromosome definition of randomly positioned loci with the same width distribution as the SPO11-1-oligo hotspots.

**Bioinformatics analysis of H3K4me3 ChIP-seq and MNase-seq data**

For MNase-seq and ChIP-seq data paired-end FASTQ files were aligned to the TAIR10 reference sequence using Bowtie2 with the following settings --very-sensitive --no-discordant --no-mixed -p 4 -k 10. To obtain uniquely aligning reads, reads with the SAM optional field “XS:i” and MAPQ scores of less than 42 were dropped. To ensure reads were kept in proper pairs, a Python script was applied. Reads with multiple valid alignments were filtered for those with MAPQ scores of 10 or higher, and the highest value alignments kept. Multiply aligning reads were treated as for SPO11-1-oligonucleotides; i.e. the best MAPQ score alignments were kept, or randomly assigned if multiple alignments had equal scores. Uniquely and multiply aligning reads were then deduplicated using SAMtools, combined and used for downstream analysis. Coverage values from these reads were calculated using Rsamtools and normalized by the sum of coverage per library. For MNase data we normalized against a Col genomic DNA library of paired end 150 bp reads. These data were aligned and processed as for the MNase libraries and used to calculate log2(MNase/gDNA) values. Finally, z-score standardization was applied. For H3K4me3 ChIP-seq data we normalized against ChIP input DNA, sequenced using paired-end 150 bp reads. These data were used to calculate log2(ChIP/input) values and z-score standardization was applied.

**Analysis of SPO11-1-oligonucleotides, crossover and chromatin patterns**

Analysis of data in relation to genomic features, including TAIR10 representative gene TSSs and TTSs, transposons (Buisine et al., 2008) and SPO11-1-oligo hotspots, was performed as previously described (Choi et al., 2013). For hexile analysis normalized values of SPO11-1-oligonucleotides were calculated in windows 500 bp upstream of TSSs for promoters or 500 bp downstream of TTSs for terminators, or within transposons. These regions were also analyzed for nucleosome occupancy (MNase-seq) and crossover-associated AT-rich motif matches (Choi et al., 2013). To test association of crossovers with SPO11-1-oligos and chromatin we used a set of 3,320 crossovers mapped via genotyping-by-sequencing in Col×Ler F2 individuals (Choi et al., 2016; Yelina et al., 2015). Crossovers were identified using the TIGER bioinformatics pipeline (Rowan et al., 2015), with a set of 481,252 Col/Ler SNPs, between which crossovers may be detected. Overlapping crossovers were merged, such that a final set of 479,888 intervals were considered, which either did or did not overlap a crossover. For each of these intervals we calculated SPO11-1-oligo, nucleosome and H3K4me3 levels using library size normalized values that were divided by gDNA or input. Where replicates were available mean values were used. Mean DNA methylation was also calculated within each interval (Stroud et al., 2013). If an interval contained no cytosines the value was treated as missing data. Data were then modeled with the glm2 function in R, using the binomial family with logistic link function. For model selection we used the R stepAIC function from the MASS package using both forward and backward directions in order to minimize the AIC. The formula for the final model selected was:

Crossovers ~ SPO11-1+nucleosomes+H3K4me3+DNAmethylation+width+interactions

We ranked windows according to each parameter and then divided ranked windows into six groups (hexiles). Using this logistic model we then obtained the probability of windows within each hexile overlapping a crossover. Predicted crossover overlaps per megabase were then compared with the observed value for each hexile.

**Supplemental References**

Bailey, T., Krajewski, P., Ladunga, I., Lefebvre, C., Li, Q., Liu, T., Madrigal, P., Taslim, C., and Zhang, J. (2013). Practical guidelines for the comprehensive analysis of ChIP-seq data. PLoS Comput. Biol. *9*, e1003326.

Buisine, N., Quesneville, H., and Colot, V. (2008). Improved detection and annotation of transposable elements in sequenced genomes using multiple reference sequence sets. Genomics *91*, 467–475.

Choi, K., Zhao, X., Kelly, K.A., Venn, O., Higgins, J.D., Yelina, N.E., Hardcastle, T.J., Ziolkowski, P.A., Copenhaver, G.P., Franklin, F.C.H., et al. (2013). Arabidopsis meiotic crossover hot spots overlap with H2A.Z nucleosomes at gene promoters. Nat. Genet. *45*, 1327–1336.

Choi, K., Reinhard, C., Serra, H., Ziolkowski, P.A., Underwood, C.J., Zhao, X., Hardcastle, T.J., Yelina, N.E., Griffin, C., Jackson, M., et al. (2016). Recombination Rate Heterogeneity within Arabidopsis Disease Resistance Genes. PLOS Genet. *12*, e1006179.

Chung, D., Kuan, P.F., Li, B., Sanalkumar, R., Liang, K., Bresnick, E.H., Dewey, C., and Keleş, S. (2011). Discovering transcription factor binding sites in highly repetitive regions of genomes with multi-read analysis of ChIP-Seq data. PLoS Comput. Biol. *7*, e1002111.

Drouaud, J., Khademian, H., Giraut, L., Zanni, V., Bellalou, S., Henderson, I.R., Falque, M., and Mézard, C. (2013). Contrasted patterns of crossover and non-crossover at Arabidopsis thaliana meiotic recombination hotspots. PLoS Genet. *9*, e1003922.

Eden, E., Navon, R., Steinfeld, I., Lipson, D., and Yakhini, Z. (2009). GOrilla: a tool for discovery and visualization of enriched GO terms in ranked gene lists. BMC Bioinformatics *10*, 48.

Feng, X., Grossman, R., and Stein, L. (2011). PeakRanger: a cloud-enabled peak caller for ChIP-seq data. BMC Bioinformatics *12*, 139.

Flores, O., and Orozco, M. (2011). nucleR: a package for non-parametric nucleosome positioning. Bioinformatics *27*, 2149–2150.

Gel, B., Díez-Villanueva, A., Serra, E., Buschbeck, M., Peinado, M.A., and Malinverni, R. (2016). regioneR: an R/Bioconductor package for the association analysis of genomic regions based on permutation tests. Bioinformatics *32*, 289–291.

Grelon, M., Vezon, D., Gendrot, G., and Pelletier, G. (2001). AtSPO11-1 is necessary for efficient meiotic recombination in plants. EMBO J. *20*, 589–600.

Hartung, F., Wurz-Wildersinn, R., Fuchs, J., Schubert, I., Suer, S., and Puchta, H. (2007). The catalytically active tyrosine residues of both SPO11-1 and SPO11-2 are required for meiotic double-strand break induction in Arabidopsis. Plant Cell *19*, 3090–3099.

Langmead, B., and Salzberg, S.L. (2012). Fast gapped-read alignment with Bowtie 2. Nat. Methods *9*, 357–359.

Li, B., and Dewey, C.N. (2011). RSEM: accurate transcript quantification from RNA-Seq data with or without a reference genome. BMC Bioinformatics *12*, 323.

Li, H., Handsaker, B., Wysoker, A., Fennell, T., Ruan, J., Homer, N., Marth, G., Abecasis, G., and Durbin, R. (2009). The Sequence Alignment/Map format and SAMtools. Bioinformatics *25*, 2078–2079.

Li, Q., Brown, J.B., Huang, H., and Bickel, P.J. (2011). Measuring reproducibility of high-throughput experiments. Ann. Appl. Stat. *5*, 1752–1779.

Rowan, B.A., Patel, V., Weigel, D., and Schneeberger, K. (2015). Rapid and Inexpensive Whole-Genome Genotyping-by-Sequencing for Crossover Localization and Fine-Scale Genetic Mapping. G3 (Bethesda). *5*, 385–398.

Saze, H., Mittelsten Scheid, O., and Paszkowski, J. (2003). Maintenance of CpG methylation is essential for epigenetic inheritance during plant gametogenesis. Nat. Genet. *34*, 65–69.

Serra, H., Lambing, C., Griffin, C.H., Topp, S.D., Seguela-Arnaud, M., Fernandes, J., Mercier, R., and Henderson, I.R. (2017). Massive crossover elevation via combination of HEI10 and recq4a recq4b during Arabidopsis meiosis. Doi.org 159764.

Stroud, H., Greenberg, M.V.C., Feng, S., Bernatavichute, Y. V, and Jacobsen, S.E. (2013). Comprehensive analysis of silencing mutants reveals complex regulation of the Arabidopsis methylome. Cell *152*, 352–364.

Yelina, N.E., Choi, K., Chelysheva, L., Macaulay, M., de Snoo, B., Wijnker, E., Miller, N., Drouaud, J., Grelon, M., Copenhaver, G.P., et al. (2012). Epigenetic remodeling of meiotic crossover frequency in Arabidopsis thaliana DNA methyltransferase mutants. PLoS Genet. *8*, e1002844.

Yelina, N.E., Lambing, C., Hardcastle, T.J., Zhao, X., Santos, B., and Henderson, I.R. (2015). DNA methylation epigenetically silences crossover hot spots and controls chromosomal domains of meiotic recombination in Arabidopsis. Genes Dev. *29*, 2183–2202.

**Supplemental Table S1. Measurement of crossover frequency in wild type and *SPO11-1-Myc spo11-1* using Fluorescent Tagged Lines (FTLs).** Genetic distances were calculated as cM = 100×(Yellow/(Yellow+Red-Yellow)). Where Yellow and Red are counts of pollen showing red (DsRed2) or yellow (eYFP) fluorescence, respectively. *X2* tests were performed by comparing the sum of green alone counts versus the sum of both color counts between wild type (Col) and *SPO11-1-Myc spo11-1* genotypes, using 2×2 contingency tables, for each FTL interval.

| FTL Interval | Genotype | Total | Red | Red-Yellow | None | Yellow | cM | *X2* |
| --- | --- | --- | --- | --- | --- | --- | --- | --- |
| *I1bc* | Col | 18,283 | 1,046 | 5,655 | 11,083 | 499 | 8.11 |  |
| *I1bc* | Col | 14,445 | 718 | 4,815 | 8,525 | 387 | 7.44 |  |
| *I1bc* | Col | 17,969 | 962 | 5,858 | 10,717 | 432 | 6.87 |  |
| *I1bc* | *SPO11-1-Myc* | 17,050 | 939 | 5,993 | 9,582 | 536 | 8.21 |  |
| *I1bc* | *SPO11-1-Myc* | 17,783 | 911 | 5,647 | 10,751 | 474 | 7.74 |  |
| *I1bc* | *SPO11-1-Myc* | 17,783 | 892 | 5,937 | 10,438 | 516 | 8.00 | 0.07 |
| *I1fg* | Col | 19,528 | 810 | 7,002 | 11,061 | 655 | 8.55 |  |
| *I1fg* | Col | 14,073 | 550 | 4,518 | 8,564 | 441 | 8.89 |  |
| *I1fg* | Col | 20,379 | 834 | 7,151 | 11,743 | 651 | 8.34 |  |
| *I1fg* | *SPO11-1-Myc* | 18,448 | 793 | 6,953 | 10,105 | 597 | 7.91 |  |
| *I1fg* | *SPO11-1-Myc* | 8,042 | 368 | 2,773 | 4,646 | 255 | 8.42 |  |
| *I1fg* | *SPO11-1-Myc* | 17,999 | 781 | 6,566 | 10,022 | 630 | 8.75 | 0.46 |
| *I2fg* | Col | 25,806 | 1,750 | 8,720 | 14,701 | 635 | 6.79 |  |
| *I2fg* | Col | 38,408 | 2,743 | 12,409 | 22,398 | 858 | 6.47 |  |
| *I2fg* | Col | 18,514 | 1,251 | 6,508 | 10,288 | 467 | 6.70 |  |
| *I2fg* | *SPO11-1-Myc* | 20,933 | 1,508 | 7,069 | 11,793 | 563 | 7.38 |  |
| *I2fg* | *SPO11-1-Myc* | 19,846 | 1,448 | 6,746 | 11,201 | 451 | 6.27 |  |
| *I2fg* | *SPO11-1-Myc* | 15,548 | 1,287 | 5,024 | 8,845 | 392 | 7.24 | 0.16 |
| *I5ab* | Col | 5,884 | 531 | 1,501 | 3,371 | 481 | 24.27 |  |
| *I5ab* | Col | 9,574 | 1,006 | 3,026 | 4,629 | 913 | 23.18 |  |
| *I5ab* | Col | 22,810 | 2,206 | 6,326 | 12,413 | 1,865 | 22.77 |  |
| *I5ab* | *SPO11-1-Myc* | 21,877 | 2,092 | 5,793 | 12,159 | 1,833 | 24.04 |  |
| *I5ab* | *SPO11-1-Myc* | 12,590 | 1,282 | 3,875 | 6,280 | 1,153 | 22.93 |  |
| *I5ab* | *SPO11-1-Myc* | 23,726 | 2,478 | 7,353 | 11,734 | 2,161 | 22.71 | 0.79 |

**Supplemental Table S2. Mapping and analysis of SPO11-1-oligonucleotide reads.** The genotype and barcode for each library are listed, followed by (i) total sequenced reads (Total reads), (ii) trimmed reads following FastX processing (Trimmed reads), (iii) mapped reads from Bowtie2 (Mapped reads), (iv) alignments filtered for 2 or fewer mismatches (Mismatch filtered), (v) uniquely aligning reads (Uniquely aligning), (vi) uniquely aligning reads following deduplication (Unique rmdup). The lower part of the table lists the same libraries followed by (i) the number of multiply aligning reads (Multiply aligning), (ii) filtered multiply aligning reads selecting single alignments with MAPQ scores greater than 10 (Multiple unique fq10), (iii) the multiple-unique reads were then deduplicated (Multiple unique fq10 rmdup) and (iv) the final number of reads selected for analysis (Unique both rmdup). Finally, the adapter sequence and read length associated with each library are listed.

| Genotype | Library  barcode | Total  reads | Trimmed  reads | Mapped  reads | Mismatch  filtered | Uniquely aligning | Unique  rmdup |
| --- | --- | --- | --- | --- | --- | --- | --- |
| Col | RPI1 | 209,124,715 | 140,685,106 | 85,708,657 | 76,147,821 | 56,093,177 | 26,049,437 |
| Col | RPI3 | 205,166,702 | 172,856,279 | 131,601,991 | 123,150,472 | 89,791,279 | 12,620,592 |
| Col | RPI8 | 72,517,675 | 60,579,240 | 54,115,435 | 51,619,430 | 39,985,012 | 10,172,066 |
| *met1* | RPI45 | 70,108,565 | 58,049,604 | 50,580,494 | 48,082,506 | 34,348,453 | 15,111,063 |
| *met1* | RPI46 | 82,723,729 | 53,727,123 | 46,466,320 | 44,576,321 | 33,334,022 | 14,551,356 |
| *met1* | RPI48 | 127,294,763 | 21,661,700 | 17,517,614 | 16,697,783 | 11,818,389 | 6,600,832 |
| Genotype | Library  barcode | Multiply  aligning | Multiple  unique fq10 | Multiple  unique fq10 rmdup | Unique  both rmdup | Adapter | Read lengths |
| Col | RPI1 | 20,054,644 | 4,574,715 | 1,966,294 | 28,015,731 | GGGTGGAATTCTCGGGTGCCAAGGCT | 10-46 |
| Col | RPI3 | 33,359,193 | 7,258,667 | 889,638 | 13,510,230 | GGGTGGAATTCTCGGGTGCCAAGGCT | 10-46 |
| Col | RPI8 | 11,634,418 | 3,581,199 | 855,527 | 11,027,593 | GGGGTGGAATTCTCGGGTGCCAAGGCT | 10-69 |
| *met1* | RPI45 | 13,734,053 | 3,531,789 | 1,512,168 | 16,623,231 | GGGGTGGAATTCTCGGGTGCCAAGGCT | 10-69 |
| *met1* | RPI46 | 11,242,299 | 3,211,285 | 1,395,203 | 15,946,559 | GGGGTGGAATTCTCGGGTGCCAAGGCT | 10-69 |
| *met1* | RPI48 | 4,879,394 | 1,035,219 | 617,578 | 7,218,410 | GGGGTGGAATTCTCGGGTGCCAAGGCT | 10-69 |

**Supplemental Table S3. Alignment lengths of SPO11-1-oligonucleotide reads.** The mean alignment length (bp) for each SPO11-1-oligo library is listed for uniquely aligning, multiply aligning, or total (all) reads.

| Library | Unique alignments (bp) | Multiple alignments  (bp) | All alignments (bp) |
| --- | --- | --- | --- |
| RPI1 | 40.6 | 40.5 | 40.6 |
| RPI3 | 36.5 | 36.5 | 36.5 |
| RPI8 | 40.2 | 40.2 | 40.2 |
| RPI45 | 42.3 | 42.4 | 42.4 |
| RPI46 | 40.8 | 40.9 | 40.9 |
| RPI48 | 40.3 | 40.2 | 40.3 |

**Supplemental Table S4. Alignment lengths of SPO11-1-oligonucleotide reads.** The proportion (%) of total alignments with different lengths is shown for the six SPO11-1-oligonucleotide libraries. Note that RPI1 and RPI3 were sequenced with 50 bp reads, RPI8 was sequenced with both 50 and 75 bp reads, and RPI45, RPI46 and RPI48 were sequenced with 75 bp reads.

| Alignment length (bp) | RPI1 | RPI3 | RPI8 | RPI45 | RPI46 | RPI48 |
| --- | --- | --- | --- | --- | --- | --- |
| 10 | 0.19 | 0.10 | 0.05 | 0.00 | 0.01 | 0.01 |
| 11 | 0.20 | 0.09 | 0.05 | 0.00 | 0.01 | 0.00 |
| 12 | 0.20 | 0.09 | 0.04 | 0.01 | 0.01 | 0.00 |
| 13 | 0.23 | 0.09 | 0.05 | 0.01 | 0.02 | 0.01 |
| 14 | 0.33 | 0.09 | 0.05 | 0.02 | 0.03 | 0.01 |
| 15 | 0.81 | 0.09 | 0.06 | 0.04 | 0.04 | 0.02 |
| 16 | 2.07 | 0.11 | 0.07 | 0.07 | 0.06 | 0.03 |
| 17 | 5.36 | 0.16 | 0.08 | 0.13 | 0.08 | 0.05 |
| 18 | 7.65 | 0.34 | 0.11 | 0.27 | 0.17 | 0.09 |
| 19 | 4.04 | 0.27 | 0.15 | 0.69 | 0.46 | 0.08 |
| 20 | 0.65 | 0.23 | 0.19 | 0.70 | 0.48 | 0.20 |
| 21 | 0.18 | 0.28 | 0.21 | 0.79 | 0.58 | 0.28 |
| 22 | 0.16 | 0.37 | 0.41 | 0.82 | 0.59 | 0.47 |
| 23 | 0.15 | 0.57 | 0.51 | 0.87 | 0.66 | 0.63 |
| 24 | 0.15 | 0.87 | 0.41 | 0.89 | 0.78 | 0.80 |
| 25 | 0.18 | 1.23 | 0.32 | 1.00 | 0.85 | 0.92 |
| 26 | 0.19 | 1.60 | 0.43 | 1.00 | 1.02 | 1.05 |
| 27 | 0.23 | 2.02 | 0.31 | 1.06 | 1.06 | 1.32 |
| 28 | 0.29 | 2.47 | 0.39 | 1.20 | 1.44 | 1.69 |
| 29 | 0.39 | 2.93 | 0.53 | 1.48 | 1.93 | 2.02 |
| 30 | 0.59 | 3.40 | 0.76 | 1.73 | 2.49 | 2.40 |
| 31 | 0.89 | 3.82 | 1.12 | 1.98 | 3.01 | 2.82 |
| 32 | 1.39 | 4.20 | 1.70 | 2.27 | 3.49 | 3.23 |
| 33 | 2.02 | 4.50 | 2.59 | 2.67 | 3.86 | 4.29 |
| 34 | 2.67 | 4.70 | 3.83 | 3.30 | 4.19 | 4.93 |
| 35 | 3.23 | 4.88 | 5.29 | 4.32 | 4.53 | 5.53 |
| 36 | 3.74 | 5.29 | 6.50 | 4.93 | 4.88 | 6.02 |
| 37 | 4.18 | 5.94 | 7.24 | 5.63 | 5.03 | 6.41 |
| 38 | 4.50 | 8.28 | 7.36 | 6.63 | 4.81 | 6.51 |
| 39 | 4.42 | 7.66 | 6.69 | 5.57 | 4.67 | 6.44 |
| 40 | 4.32 | 5.62 | 5.49 | 5.10 | 4.32 | 6.29 |
| 41 | 3.99 | 4.00 | 4.65 | 4.89 | 4.09 | 5.03 |
| 42 | 4.31 | 3.98 | 20.82 | 4.76 | 3.99 | 4.54 |
| 43 | 2.22 | 1.69 | 4.11 | 4.44 | 3.95 | 3.91 |
| 44 | 0.88 | 0.57 | 3.72 | 3.50 | 3.93 | 3.77 |
| 45 | 0.02 | 0.01 | 3.34 | 3.03 | 3.91 | 3.08 |
| 46 | 32.98 | 17.48 | 2.87 | 2.98 | 3.83 | 2.81 |
| 47 | 0.00 | 0.00 | 2.32 | 2.77 | 3.66 | 2.35 |
| 48 | 0.00 | 0.00 | 1.76 | 2.75 | 3.43 | 1.95 |
| 49 | 0.00 | 0.00 | 1.25 | 2.48 | 3.10 | 1.73 |
| 50 | 0.00 | 0.00 | 0.84 | 2.32 | 2.70 | 1.41 |
| 51 | 0.00 | 0.00 | 0.54 | 2.22 | 2.24 | 1.20 |
| 52 | 0.00 | 0.00 | 0.34 | 1.95 | 1.76 | 0.89 |
| 53 | 0.00 | 0.00 | 0.20 | 1.80 | 1.31 | 0.79 |
| 54 | 0.00 | 0.00 | 0.11 | 1.78 | 0.91 | 0.72 |
| 55 | 0.00 | 0.00 | 0.06 | 1.20 | 0.61 | 0.43 |
| 56 | 0.00 | 0.00 | 0.03 | 0.50 | 0.38 | 0.34 |
| 57 | 0.00 | 0.00 | 0.02 | 0.43 | 0.24 | 0.20 |
| 58 | 0.00 | 0.00 | 0.02 | 0.39 | 0.15 | 0.12 |
| 59 | 0.00 | 0.00 | 0.01 | 0.25 | 0.10 | 0.08 |
| 60 | 0.00 | 0.00 | 0.01 | 0.16 | 0.06 | 0.05 |
| 61 | 0.00 | 0.00 | 0.01 | 0.10 | 0.04 | 0.03 |
| 62 | 0.00 | 0.00 | 0.00 | 0.06 | 0.03 | 0.02 |
| 63 | 0.00 | 0.00 | 0.00 | 0.03 | 0.01 | 0.01 |
| 64 | 0.00 | 0.00 | 0.00 | 0.01 | 0.00 | 0.00 |
| 65 | 0.00 | 0.00 | 0.00 | 0.00 | 0.00 | 0.00 |
| 66 | 0.00 | 0.00 | 0.00 | 0.00 | 0.00 | 0.00 |
| 67 | 0.00 | 0.00 | 0.00 | 0.00 | 0.00 | 0.00 |
| 68 | 0.00 | 0.00 | 0.00 | 0.00 | 0.00 | 0.00 |
| 69 | 0.00 | 0.00 | 0.00 | 0.00 | 0.00 | 0.00 |
| Total | 100 | 100 | 100 | 100 | 100 | 100 |

**Supplemental Table S5. Correlation between SPO11-1-oligonucleotide libraries at varying physical scales**. Library size normalized SPO11-1-oligo coverage values were calculated in adjacent windows of the indicated physical size and Spearman’s rank correlation calculated between libraries. All correlations were significant and the correlation coefficient is reported.

| Library 1 | RPI1 | RPI1 | RPI3 | RPI45 | RPI45 | RPI46 |
| --- | --- | --- | --- | --- | --- | --- |
| Library 2 | RPI3 | RPI8 | RPI8 | RPI46 | RPI48 | RPI48 |
| Genotype | Col | Col | Col | *met1* | *met1* | *met1* |
| 2 kb | 0.964 | 0.967 | 0.952 | 0.979 | 0.951 | 0.964 |
| 5 kb | 0.964 | 0.967 | 0.952 | 0.979 | 0.951 | 0.964 |
| 10 kb | 0.972 | 0.974 | 0.963 | 0.982 | 0.958 | 0.972 |
| 20 kb | 0.980 | 0.981 | 0.974 | 0.985 | 0.964 | 0.979 |
| 50 kb | 0.987 | 0.988 | 0.985 | 0.988 | 0.967 | 0.985 |
| 100 kb | 0.991 | 0.993 | 0.993 | 0.994 | 0.982 | 0.992 |

**Supplemental Table S6. Mapping and analysis of SPO11-1-oligo negative and positive control libraries.** The genotype and barcode for each library are listed, followed by (i) total sequenced reads (Total reads), (ii) trimmed reads following FastX processing (Trimmed reads), (iii) mapped reads from Bowtie2 (Mapped reads), (iv) alignments filtered for 2 or fewer mismatches (Mismatch filtered), (v) uniquely aligning reads (Uniquely aligning), (vi) uniquely aligning reads following deduplication (Unique rmdup). The lower part of the table lists the same libraries followed by (i) the number of multiply aligning reads (Multiply aligning), (ii) filtered multiply aligning reads selecting single alignments with MAPQ scores greater than 10 (Multiple unique fq10), (iii) the multiple-unique reads were then deduplicated (Multiple unique fq10 rmdup) and (iv) the final number of reads selected for analysis (Unique both rmdup). Finally, the adapter sequence and read length associated with each library are listed.

| Genotype | Library  barcode | Total  reads | Trimmed  reads | Mapped  reads | Mismatch  filtered | Uniquely aligning | Unique  rmdup |
| --- | --- | --- | --- | --- | --- | --- | --- |
| Col | NC-6 | 14,016,645 | 109,061 | 53,887 | 40,916 | 1,274 | 1,263 |
| Col | NC-14 | 15,507,763 | 223,053 | 130,335 | 78,549 | 2,561 | 2,492 |
| *SPO11-1-Myc* | 34 | 21,066,785 | 20,096,881 | 19,800,296 | 14,513,578 | 12,108,045 | 7,854,555 |
| *SPO11-1-Myc* | 41 | 20,407,980 | 20,324,832 | 18,761,931 | 13,740,693 | 13,276,472 | 4,959,856 |
| Genotype | Library  barcode | Multiply  aligning | Multiple  unique fq10 | Multiple  unique fq10 rmdup | Unique  both rmdup | Adapter | Read lengths |
| Col | NC-6 | 39,642 | 185 | 143 | 1,406 | GGGGTGGAATTCTCGGGTGCCAAGGCT | 10 to 67 |
| Col | NC-14 | 75,988 | 414 | 240 | 2,732 | GGGGTGGAATTCTCGGGTGCCAAGGCT | 10 to 67 |
| *SPO11-1-Myc* | 34 | 2,405,533 | 1,118,427 | 704,573 | 8,559,128 | GGGGTGGAATTCTCGGGTGCCAAGGCT | 10 to 67 |
| *SPO11-1-Myc* | 41 | 464,221 | 463,998 | 462,867 | 5,422,723 | GGGGTGGAATTCTCGGGTGCCAAGGCT | 10 to 67 |

**Supplemental Table S7. Mapping and analysis of micrococcal nuclease (MNase) sequencing data.** The genotype of each library is listed, followed by (i) total sequenced reads (Total reads), (ii) mapped reads from Bowtie2 (Mapped reads), (iii) alignments filtered for 2 or fewer mismatches (Mismatch filtered), (iv) uniquely aligning reads (Uniquely aligning), (v) uniquely aligning reads following deduplication (Unique rmdup), (vi) the number of multiply aligning reads (Multiply aligning), (vii) filtered multiply aligning reads selecting single alignments with MAPQ scores greater than 10 (Multiple unique fq10), (viii) the multiple-unique reads were then deduplicated (Multiple unique fq10 rmdup) and (ix) the final number of reads selected for analysis (Unique both rmdup). Wild type (WT) data is as published (Choi et al., 2016).

| Genotype | Total reads | Mapped reads | Mismatch filtered | Uniquely aligning | Unique rmdup | Multiply  aligning | Multiple  unique  fq10 | Multiple  unique  fq10 rmdup | Unique both rmdup |
| --- | --- | --- | --- | --- | --- | --- | --- | --- | --- |
| WT | 45,683,416 | 45,223,343 | 40,828,749 | 25,772,541 | 14,455,347 | 15,056,208 | 4,892,714 | 2,432,449 | 16,887,796 |
| *met1* | 47,255,528 | 46,828,247 | 42,322,676 | 27,576,019 | 14,942,976 | 14,746,657 | 4,600,472 | 2,247,540 | 17,190,516 |

**Supplemental Table S8. Mapping and analysis of H3K4me3 ChIP-sequencing data.** The genotype and replicate number for each library is listed, followed by (i) total sequenced reads (Total reads), (ii) mapped reads from Bowtie2 (Mapped reads), (iii) alignments filtered for 2 or less mismatches (Mismatch filtered), (iv) uniquely aligning reads (Uniquely aligning), (v) uniquely aligning reads following deduplication (Unique rmdup), (vi) the number of multiply aligning reads (Multiply aligning), (vii) filtered multiply aligning reads selecting single alignments with MAPQ scores greater than 10 (Multiple unique fq10), (viii) the multiple-unique reads were then deduplicated (Multiple unique fq10 rmdup) and (ix) the final number of reads selected for analysis (Unique both rmdup).

| Genotype | Total reads | Mapped reads | Mismatch filtered | Uniquely aligning | Unique  rmdup | Multiply  aligning | Multiple  unique  fq10 | Multiple  unique  fq10 rmdup | Unique both rmdup |
| --- | --- | --- | --- | --- | --- | --- | --- | --- | --- |
| Wild type (Col) replicate 1 | 10,954,294 | 10,398,701 | 10,189,898 | 9,258,923 | 5,628,183 | 930,975 | 464,853 | 339,527 | 5,967,710 |
| Wild type (Col) replicate 2 | 18,253,263 | 17,490,043 | 17,176,298 | 15,447,611 | 8,961,624 | 1,728,687 | 915,626 | 638,203 | 9,599,827 |
| Wild type (Col) replicate 3 | 16,047,992 | 15,093,213 | 14,825,030 | 13,085,327 | 8,016,418 | 1,739,703 | 776,414 | 562,551 | 8,578,969 |
| *met1-3*  replicate 1 | 16,757,139 | 16,045,636 | 15,781,092 | 13,794,882 | 8,884,327 | 1,986,210 | 1,092,772 | 797,664 | 9,681,991 |
| *met1-3*  replicate 2 | 14,999,504 | 14,071,337 | 13,840,533 | 11,910,029 | 7,940,320 | 1,930,504 | 945,806 | 708,868 | 8,649,187 |
| *met1-3*  replicate 3 | 16,000,640 | 14,841,634 | 14,598,894 | 12,764,652 | 8,409,290 | 1,834,242 | 1,012,394 | 752,029 | 9,161,319 |

**Supplemental Table S9. Crossovers identified by genotyping-by-sequencing of Col×Ler F2 individuals.** Crossovers (CO) were mapped by sequencing DNA from 437 F2 individuals to ~1-2× depth. 192 of these F2 individuals were previously reported (ArrayExpress E-MTAB-4657) (Choi et al., 2016), and 245 are from (Serra et al., 2017) (ArrayExpress E-MTAB-5949).

|  | Col/Ler | |
| --- | --- | --- |
| CO/F2 | Total CO |
| Total | 7.60 | 3,320 |
| Chromosome 1 | 1.84 | 802 |
| Chromosome 2 | 1.29 | 562 |
| Chromosome 3 | 1.46 | 639 |
| Chromosome 4 | 1.25 | 547 |
| Chromosome 5 | 1.76 | 770 |

**Supplemental Table S10. Generalized linear model showing the relationship between crossovers, SPO11-1-oligos and chromatin.** Crossovers were detected between SNPs using genotyping-by-sequencing. The incidence of a crossover within a SNP interval was treated as a categorical variable. Within the same windows we calculated SPO11-1-oligo or chromatin modification (nucleosomes, H3K4me3 and DNA methylation) levels as explanatory variables. The width of the intervals was also considered in the model, with the formula:

COs ~ SPO11-1-oligos+nucleosomes+H3K4me3+DNAmethylation+width+interactions

The output of the model analysis is shown in the table reporting the coefficients estimate, the estimated standard error, the z-value and a two-tailed *P*-value (Pr(>|z|)) corresponding to the z ratio. Significance codes indicate: .= *P<*0.1, *= *P<*0.05, **= *P<*0.01, ***= *P<*0.001.

|  | Coefficients estimate | Standard error | z-value | Pr(>|z|) | Significance |
| --- | --- | --- | --- | --- | --- |
| (Intercept) | -4.262000 | 0.0627800 | -67.8850 | < 2.00×10-16 | *** |
| SPO11-1-oligos | 0.175700 | 0.0264800 | -6.6360 | 3.23×10-11 | *** |
| Nucleosomes | -0.333700 | 0.0519400 | -6.4250 | 1.32×10-10 | *** |
| H3K4me3 | -0.021910 | 0.0342500 | -0.6400 | 0.522 |  |
| DNA methylation | -4.108000 | 0.4325000 | -9.4970 | < 2.00×10-16 | *** |
| Width | -0.000221 | 0.0000382 | -5.7670 | 8.08×10-9 | *** |
| SPO11-1:Nucleosomes | 0.027480 | 0.0052170 | 5.2670 | 1.39×10-7 | *** |
| SPO11-1:H3K4me3 | 0.054670 | 0.0113000 | 4.8390 | 1.30×10-6 | *** |
| SPO11-1:Width | 0.000478 | 0.0000381 | 12.5580 | < 2.00×10-16 | *** |
| Nucleosomes:H3K4me3 | -0.082930 | 0.0361800 | -2.2920 | 0.0219 | * |
| Nucleosomes:DNA methylation | -0.529000 | 0.3205000 | -1.6510 | 0.0988 | . |
| H3K4me3:DNA methylation | 0.178700 | 0.0621500 | 2.8750 | 4.04×10-3 | ** |
| DNA methylation:Width | -0.001024 | 0.0001920 | -5.3320 | 9.71×10-8 | *** |

**Supplemental Table S11. Overlap of SPO11-1-oligo hotspots (n = 5,914) with crossovers, nucleosomes, genes and transposons genome-wide.** To analyze overlap of SPO11-1-oligo hotspots with sequence features we performed permutation tests using the R package regioneR (10,000 permutations per test) (Gel et al., 2016). Significantly greater or fewer overlaps than expected from the permuted loci are indicated in blue and red, respectively. Nucleosomes were identified in the MNase-seq data using the R package nucleR (Flores and Orozco, 2011), or the ranger tool in the PeakRanger suite (Feng et al., 2011).

| **Annotation feature** | | **Number** | **Overlaps** | | ***P*-value** | **Local**  **z-score** |
| --- | --- | --- | --- | --- | --- | --- |
| **Expected (mean permuted)** | **Observed** |
| Crossovers | | 3,320 | 277 | 388 | < 0.0001 | 6.82 |
| Nucleosomes (nucleR) | | 57,734 | 1,891 | 241 | < 0.0001 | -45.17 |
| Nucleosomes (ranger) | | 55,008 | 2,229 | 860 | < 0.0001 | -37.55 |
| Genes (TSS to TTS) | | 27,204 | 3,712 | 1,716 | < 0.0001 | -56.75 |
| Gene promoters (TSS-500 bp) | | 27,204 | 1,595 | 2,463 | < 0.0001 | 27.11 |
| Gene terminators (TTS+500 bp) | | 27,204 | 1,501 | 1,485 | 0.3092 | -0.48 |
| Transposons | All | 31,189 | 1,663 | 3,154 | < 0.0001 | 42.18 |
| DNA elements | All | 21,300 | 1,056 | 3,002 | < 0.0001 | 61.38 |
| Helitrons | 12,945 | 636 | 2,574 | < 0.0001 | 79.32 |
| Pogo/Tc1/  Mariner | 590 | 31 | 136 | < 0.0001 | 17.89 |
| MuDR | 5,410 | 352 | 677 | < 0.0001 | 17.26 |
| EnSpm | 941 | 83 | 43 | < 0.0001 | -4.08 |
| hAT | 1,035 | 58 | 56 | 0.4654 | -0.28 |
| Harbinger | 379 | 26 | 23 | 0.3103 | -0.57 |
| RNA elements | All | 7,850 | 622 | 220 | < 0.0001 | -16.51 |
| Gypsy LTR | 4,181 | 372 | 58 | < 0.0001 | -17.53 |
| Copia LTR | 1,781 | 143 | 83 | < 0.0001 | -4.80 |
| LINE-L1 | 1,366 | 103 | 57 | < 0.0001 | -4.30 |
| SINE | 522 | 24 | 27 | 0.2915 | 0.67 |

**Supplemental Table S12. SPO11-1-oligo and nucleosome occupancy within *Arabidopsis* transposon families.** The SPO11-1-oligonucleotide (z-score standardized log2(SPO11-1/gDNA)) and nucleosome (z-score standardized log2(MNase-seq/gDNA)) scores represent mean values within members of the listed *Arabidopsis* transposon families.

| Transposon family | Class | Number | Mean length (bp) | Total length (bp) | SPO11-1-oligos | Nucleosomes  (MNase-seq) |
| --- | --- | --- | --- | --- | --- | --- |
| Pogo, Tc1, Mariner | DNA | 590 | 320 | 188,850 | 0.695 | -1.020 |
| Helitron | DNA | 12,945 | 582 | 7,535,358 | 0.852 | -1.629 |
| MuDR | DNA | 5,410 | 765 | 4,137,203 | 0.324 | -0.503 |
| PIF/Harbinger | DNA | 379 | 654 | 248,007 | -0.102 | 0.338 |
| hAT | DNA | 1,035 | 445 | 460,061 | -0.008 | -0.240 |
| Copia LTR | RNA | 1,781 | 1,076 | 1,917,157 | -0.004 | -0.253 |
| EnSpm/CACTA | DNA | 941 | 1,250 | 1,176,532 | -0.400 | 0.690 |
| SINE | RNA | 522 | 166 | 86,402 | -0.033 | 0.189 |
| LINE L1 | RNA | 1,366 | 913 | 1,247,521 | -0.182 | 0.342 |
| Gypsy LTR | RNA | 4,181 | 1,667 | 6,970,284 | -0.016 | 0.115 |

**Supplemental Table S13. Analysis of *Arabidopsis* transposons according to SPO11-1-oligonucleotide hexiles.** Data are shown for transposon groups (hexiles) ranked by SPO11-1-oligonucleotide levels (z-score standardized log2(SPO11-1/gDNA)), showing number of elements (n), mean length (bp), total length (bp), mean SPO11-1-oligos in wild type (Col) and *met1* and mean nucleosome occupancy (NUCS, (z-score standardized log2(MNase-seq/gDNA))) in Col and *met1*. The bottom rows of each sub-table show Pearson’s correlation coefficient (*r*) and the associated *P*-value between the hexile SPO11-1-oligo values and the parameter reported for that column.

| Transposon hexile | n | Mean  length  (bp) | Total  length  (bp) | SPO11-1  Col | SPO11-1  *met1* | NUCS  Col | NUCS  *met1* |
| --- | --- | --- | --- | --- | --- | --- | --- |
| 1 | 4,859 | 406 | 1,972,676 | 1.278 | 0.854 | -1.256 | -1.021 |
| 2 | 4,858 | 563 | 2,735,279 | 0.873 | 0.476 | -1.228 | -1.049 |
| 3 | 4,858 | 504 | 2,449,255 | 0.573 | 0.299 | -0.852 | -0.820 |
| 4 | 4,858 | 640 | 3,111,181 | 0.211 | 0.160 | -0.280 | -0.414 |
| 5 | 4,858 | 1,287 | 6,249,853 | -0.215 | -0.061 | 0.249 | -0.320 |
| 6 | 4,859 | 1,533 | 7,449,131 | -0.834 | -0.430 | 0.656 | -0.255 |
| Corr. | *r=* | -0.935 |  | n.d. |  | -0.980 |  |
|  | *P=* | 0.006 |  | n.d. |  | 0.0006 |  |

**Supplemental Table S14.** **Analysis of *Arabidopsis* genes according to SPO11-1-oligonucleotide promoter hexiles.** Data are shown for groups of genes (hexiles) ranked by levels of SPO11-1-oligonucleotides (z-score standardized log2(SPO11-1/gDNA)) in promoter regions, showing number of genes (n), mean SPO11-1-oligonucleotide (SPO11-1), mean nucleosome occupancy (NUCS, (z-score standardized log2(MNase-seq/gDNA))), mean matches to a recombination-associated AT-rich sequence (Choi et al., 2013), mean intergenic distance (Intergenic bp) and mean RNA-seq from Col floral buds (Log RNA exp). The bottom rows show Pearson’s correlation coefficient (*r*) and the associated *P*-value between the hexile SPO11-1 values and the parameter reported for that column.

| Hexile | (n) | SPO11-1 | NUCS | AT-rich | Intergenic bp | Log RNA exp |
| --- | --- | --- | --- | --- | --- | --- |
| 1 | 4,534 | 0.979 | -1.184 | 6.08 | 2,008 | 5.947 |
| 2 | 4,535 | 0.666 | -0.978 | 5.06 | 1,908 | 6.111 |
| 3 | 4,535 | 0.465 | -0.811 | 4.46 | 1,856 | 6.291 |
| 4 | 4,535 | 0.254 | -0.612 | 3.59 | 1,765 | 6.438 |
| 5 | 4,535 | 0.114 | -0.499 | 2.72 | 1,739 | 6.618 |
| 6 | 4,535 | -0.039 | -0.298 | 1.94 | 1,611 | 6.256 |
| Corr. | *r=* | nd | -0.994 | 0.991 | 0.983 | -0.780 |
| *P=* | nd | 4.88×10-5 | 1.34×10-4 | 4.44×10-4 | 0.068 |

**Supplemental Table S15.** **Analysis of *Arabidopsis* genes according to SPO11-1-oligonucleotide terminator hexiles.** Data are shown groups of genes (hexiles) ranked by levels of SPO11-1-oligonucleotides (z-score standardized log2(SPO11-1/gDNA)) in terminator regions, showing number of genes (n), mean SPO11-1-oligonucleotide (SPO11-1), mean nucleosome occupancy (NUCS, (z-score standardized log2(MNase-seq/gDNA))), mean matches to a recombination-associated AT-rich sequence (Choi et al., 2013), mean intergenic distance (Intergenic bp), mean RNA-seq from Col floral buds (Log RNA exp). The bottom rows show Pearson’s correlation coefficient (*r*) and the associated *P*-value between the hexile SPO11-1 values and the parameter reported for that column.

| Hexile | (n) | SPO11-1 | NUCS | AT-rich | Inter (bp) | Log RNA exp |
| --- | --- | --- | --- | --- | --- | --- |
| 1 | 4,534 | 0.895 | -0.918 | 5.14 | 1,916 | 5.528 |
| 2 | 4,535 | 0.540 | -0.568 | 3.87 | 1,897 | 5.865 |
| 3 | 4,535 | 0.308 | -0.273 | 3.12 | 1,831 | 6.151 |
| 4 | 4,535 | 0.098 | -0.091 | 2.26 | 1,787 | 6.563 |
| 5 | 4,535 | -0.139 | 0.111 | 1.56 | 1,766 | 6.897 |
| 6 | 4,535 | -0.534 | 0.280 | 1.14 | 1,698 | 6.657 |
| Corr. | *r=* | nd | -0.984 | 0.981 | 0.985 | -0.907 |
|  | *P=* | nd | 3.66×10-4 | 5.58×10-4 | 3.35×10-4 | 0.0126 |

**Supplemental Table S16. Gene ontology enrichment analysis associated with gene promoter SPO11-1-oligonucleotide levels.** Enrichment is defined as (b/n)/(B/N), where N is the total number of genes, B is the total number of genes associated with a specific GO term, n is the number of genes in the input set and b is the number of input genes with a specific GO term. The *P*-value shown is for enrichment, whereas the FDR q-value is corrected for multiple testing.The GOrilla webtool (Eden et al., 2009) was used for analysis of genes ranked by normalized SPO11-1-oligo levels in 500 bp regions upstream of transcriptional start sites (TSSs).

| **GO term** | **Description** | [***P*-value**](http://cbl-gorilla.cs.technion.ac.il/GOrilla/oqwysxed/GOResultsPROCESS.html#p_value_info) | [**FDR q-value**](http://cbl-gorilla.cs.technion.ac.il/GOrilla/oqwysxed/GOResultsPROCESS.html#fdr_info) | [**Enrichment (N, B, n, b)**](http://cbl-gorilla.cs.technion.ac.il/GOrilla/oqwysxed/GOResultsPROCESS.html#enrich_info) |
| --- | --- | --- | --- | --- |
| [GO:0001906](http://www.godatabase.org/cgi-bin/amigo/go.cgi?query=GO:0001906&view=details" \t "_blank) | cell killing | 1.66E-16 | 5.81E-13 | 4.04 (17132,160,1352,51) |
| [GO:0044364](http://www.godatabase.org/cgi-bin/amigo/go.cgi?query=GO:0044364&view=details" \t "_blank) | disruption of cells of other organism | 1.66E-16 | 2.91E-13 | 4.04 (17132,160,1352,51) |
| [GO:0031640](http://www.godatabase.org/cgi-bin/amigo/go.cgi?query=GO:0031640&view=details" \t "_blank) | killing of cells of other organism | 1.66E-16 | 1.94E-13 | 4.04 (17132,160,1352,51) |
| [GO:0035821](http://www.godatabase.org/cgi-bin/amigo/go.cgi?query=GO:0035821&view=details" \t "_blank) | modification of morphology or physiology of other organism | 3.07E-16 | 2.69E-13 | 3.99 (17132,162,1352,51) |
| [GO:0044419](http://www.godatabase.org/cgi-bin/amigo/go.cgi?query=GO:0044419&view=details" \t "_blank) | interspecies interaction between organisms | 1.02E-15 | 7.13E-13 | 3.89 (17132,166,1352,51) |
| [GO:0050832](http://www.godatabase.org/cgi-bin/amigo/go.cgi?query=GO:0050832&view=details" \t "_blank) | defense response to fungus | 6.71E-15 | 3.91E-12 | 3.93 (17132,218,1000,50) |
| [GO:0009620](http://www.godatabase.org/cgi-bin/amigo/go.cgi?query=GO:0009620&view=details" \t "_blank) | response to fungus | 5.03E-14 | 2.51E-11 | 3.76 (17132,228,1000,50) |
| [GO:0098542](http://www.godatabase.org/cgi-bin/amigo/go.cgi?query=GO:0098542&view=details" \t "_blank) | defense response to other organism | 4.62E-13 | 2.02E-10 | 2.57 (17132,291,1625,71) |
| [GO:0051704](http://www.godatabase.org/cgi-bin/amigo/go.cgi?query=GO:0051704&view=details" \t "_blank) | multi-organism process | 6.77E-13 | 2.63E-10 | 2.99 (17132,371,897,58) |
| [GO:0009607](http://www.godatabase.org/cgi-bin/amigo/go.cgi?query=GO:0009607&view=details" \t "_blank) | response to biotic stimulus | 1.55E-12 | 5.43E-10 | 2.47 (17132,384,1352,75) |
| [GO:0051707](http://www.godatabase.org/cgi-bin/amigo/go.cgi?query=GO:0051707&view=details" \t "_blank) | response to other organism | 1.56E-12 | 4.95E-10 | 2.53 (17132,361,1352,72) |
| [GO:0043207](http://www.godatabase.org/cgi-bin/amigo/go.cgi?query=GO:0043207&view=details" \t "_blank) | response to external biotic stimulus | 3.50E-12 | 1.02E-09 | 2.49 (17132,367,1352,72) |
| [GO:0009605](http://www.godatabase.org/cgi-bin/amigo/go.cgi?query=GO:0009605&view=details" \t "_blank) | response to external stimulus | 2.52E-11 | 6.77E-09 | 2.35 (17132,405,1352,75) |
| [GO:0006952](http://www.godatabase.org/cgi-bin/amigo/go.cgi?query=GO:0006952&view=details" \t "_blank) | defense response | 5.81E-09 | 1.45E-06 | 1.89 (17132,588,1493,97) |
| [GO:0006950](http://www.godatabase.org/cgi-bin/amigo/go.cgi?query=GO:0006950&view=details" \t "_blank) | response to stress | 4.16E-08 | 9.71E-06 | 1.55 (17132,1134,1672,171) |
| [GO:0050896](http://www.godatabase.org/cgi-bin/amigo/go.cgi?query=GO:0050896&view=details" \t "_blank) | response to stimulus | 1.07E-07 | 2.35E-05 | 1.83 (17132,1649,529,93) |
| [GO:0042744](http://www.godatabase.org/cgi-bin/amigo/go.cgi?query=GO:0042744&view=details" \t "_blank) | hydrogen peroxide catabolic process | 7.77E-06 | 1.60E-03 | 3.39 (17132,64,1581,20) |
| [GO:0072593](http://www.godatabase.org/cgi-bin/amigo/go.cgi?query=GO:0072593&view=details" \t "_blank) | reactive oxygen species metabolic process | 9.81E-06 | 1.91E-03 | 3.42 (17132,77,1302,20) |
| [GO:0042743](http://www.godatabase.org/cgi-bin/amigo/go.cgi?query=GO:0042743&view=details" \t "_blank) | hydrogen peroxide metabolic process | 2.83E-05 | 5.21E-03 | 3.14 (17132,69,1581,20) |
| [GO:0006979](http://www.godatabase.org/cgi-bin/amigo/go.cgi?query=GO:0006979&view=details" \t "_blank) | response to oxidative stress | 3.09E-04 | 5.40E-02 | 2.91 (17132,161,622,17) |
| [GO:0044092](http://www.godatabase.org/cgi-bin/amigo/go.cgi?query=GO:0044092&view=details" \t "_blank) | negative regulation of molecular function | 5.32E-04 | 8.86E-02 | 2.66 (17132,70,1751,19) |
| [GO:0006560](http://www.godatabase.org/cgi-bin/amigo/go.cgi?query=GO:0006560&view=details" \t "_blank) | proline metabolic process | 5.39E-04 | 8.57E-02 | 56.54 (17132,2,303,2) |
| [GO:0006595](http://www.godatabase.org/cgi-bin/amigo/go.cgi?query=GO:0006595&view=details" \t "_blank) | polyamine metabolic process | 6.48E-04 | 9.86E-02 | 73.21 (17132,3,156,2) |
| [GO:0009755](http://www.godatabase.org/cgi-bin/amigo/go.cgi?query=GO:0009755&view=details" \t "_blank) | hormone-mediated signaling pathway | 7.60E-04 | 1.11E-01 | 2.08 (17132,149,1494,27) |
| [GO:0043086](http://www.godatabase.org/cgi-bin/amigo/go.cgi?query=GO:0043086&view=details" \t "_blank) | negative regulation of catalytic activity | 8.92E-04 | 1.25E-01 | 2.63 (17132,67,1751,18) |

**Supplemental Table S17. Association of *Arabidopsis* NBS-LRR gene homologs with transposons.** Annotated NBS-LRR genes from the TAIR10 genome assembly are listed. Families of transposons located within 500 bp upstream of TSS (promoter), 500 bp downstream of TTS (terminator), 5′-UTR or introns are listed. Also listed are names associated with specific NBS-LRR genes, in addition to classification of loci as singleton, tandem, inverted or complex clusters, including number of genes. Rows belonging to alternate loci are shaded white and gray.

| Gene | Gene name | Chr | Transposons | TE location | NBS-LRR locus | NBS-LRR members |
| --- | --- | --- | --- | --- | --- | --- |
| AT1G10920.1 | *LOV1* | 1 |  |  | singleton | 1 |
| AT1G12210.1 | *RFL1* | 1 |  |  | tandem | 2 |
| AT1G12220.1 | *RPS5* | 1 |  |  | tandem | 2 |
| AT1G12280.1 | *SUMM2* | 1 |  |  | tandem | 2 |
| AT1G12290.1 |  | 1 |  |  | tandem | 2 |
| AT1G15890.1 |  | 1 |  |  | singleton | 1 |
| AT1G17600.1 |  | 1 |  |  | tandem inverted | 3 |
| AT1G17610.1 |  | 1 |  |  | tandem inverted | 3 |
| AT1G17615.1 |  | 1 |  |  | tandem inverted | 3 |
| AT1G27170.1 |  | 1 |  |  | tandem | 2 |
| AT1G27180.1 |  | 1 | MuDR | intron | tandem | 2 |
| AT1G31540.2 | *RAC1* | 1 | Helitron | promoter, terminator | singleton | 1 |
| AT1G33560.1 | *ADR1* | 1 | EnSpm | promoter, terminator | singleton | 1 |
| AT1G47370.1 |  | 1 | EnSpm, Copia | promoter, terminator | singleton | 1 |
| AT1G50180.1 |  | 1 |  |  | singleton | 1 |
| AT1G51270.3 |  | 1 | MuDR, Helitron | promoter, terminator | singleton | 1 |
| AT1G51480.1 |  | 1 |  |  | singleton | 1 |
| AT1G52660.1 |  | 1 |  |  | singleton | 1 |
| AT1G52900.1 |  | 1 | Helitron | promoter | singleton | 1 |
| AT1G53350.1 |  | 1 |  |  | singleton | 1 |
| AT1G56510.1 | *WRR4* | 1 | Helitron | intron | tandem inverted | 3 |
| AT1G56520.2 |  | 1 |  |  | tandem inverted | 3 |
| AT1G56540.1 |  | 1 |  |  | tandem inverted | 3 |
| AT1G57650.1 |  | 1 | Copia | promoter | inverted | 2 |
| AT1G57670.1 |  | 1 | Helitron | promoter | inverted | 2 |
| AT1G57830.1 |  | 1 |  |  | tandem | 2 |
| AT1G57850.1 |  | 1 | Helitron | intron | tandem | 2 |
| AT1G58390.1 |  | 1 |  |  | tandem | 3 |
| AT1G58400.1 |  | 1 |  |  | tandem | 3 |
| AT1G58410.1 |  | 1 |  |  | tandem | 3 |
| AT1G58602.1 | *RPP7* | 1 | MuDR  Helitron  hAT | intron | complex | 5 |
| AT1G58807.1 |  | 1 | Helitron | promoter | complex | 5 |
| AT1G58848.1 |  | 1 | Helitron  Copia | promoter, terminator | complex | 5 |
| AT1G59124.1 |  | 1 | Helitron | promoter | complex | 5 |
| AT1G59218.1 |  | 1 | Helitron | promoter | complex | 5 |
| AT1G59620.1 | *CW9* | 1 |  |  | singleton | 1 |
| AT1G59780.1 |  | 1 | MuDR | intron | singleton | 1 |
| AT1G60320.1 |  | 1 |  |  | singleton | 1 |
| AT1G61105.1 |  | 1 | MuDR  Helitron | intron, terminator | singleton | 1 |
| AT1G61180.2 |  | 1 |  |  | tandem | 2 |
| AT1G61190.1 | *RPP39* | 1 |  |  | tandem | 2 |
| AT1G61300.1 |  | 1 | Helitron  MuDR | terminator | tandem | 2 |
| AT1G61310.1 |  | 1 | Copia | promoter | tandem | 2 |
| AT1G62630.1 |  | 1 |  |  | singleton | 1 |
| AT1G63350.1 | *HRG4* | 1 |  |  | tandem | 2 |
| AT1G63360.1 | *HRG5* | 1 |  |  | tandem | 2 |
| AT1G63730.1 |  | 1 |  |  | tandem | 3 |
| AT1G63740.1 |  | 1 |  |  | tandem | 3 |
| AT1G63750.3 | *HRG6* | 1 | DNA | 5′ UTR | tandem | 3 |
| AT1G63860.1 |  | 1 |  |  | tandem | 3 |
| AT1G63870.1 |  | 1 | Helitron  MuDR | intron | tandem | 3 |
| AT1G63880.1 |  | 1 |  |  | tandem | 3 |
| AT1G64070.1 | *RLM1* | 1 |  |  | singleton | 1 |
| AT1G65390.1 |  | 1 | hAT | terminator | singleton | 1 |
| AT1G65850.2 | *HRG1* | 1 | MuDR | promoter, terminator | singleton | 1 |
| AT1G66090.1 |  | 1 | Helitron | intron, terminator | singleton | 1 |
| AT1G69550.1 |  | 1 |  |  | singleton | 1 |
| AT1G72840.2 |  | 1 |  |  | complex | 11 |
| AT1G72850.1 |  | 1 |  |  | complex | 11 |
| AT1G72860.1 |  | 1 |  |  | complex | 11 |
| AT1G72870.1 |  | 1 |  |  | complex | 11 |
| AT1G72890.2 |  | 1 | Helitron | promoter | complex | 11 |
| AT1G72900.1 |  | 1 | LINE/L1 | terminator | complex | 11 |
| AT1G72910.1 |  | 1 | LINE/L1 | promoter | complex | 11 |
| AT1G72920.1 |  | 1 |  |  | complex | 11 |
| AT1G72930.1 |  | 1 |  |  | complex | 11 |
| AT1G72940.1 |  | 1 |  |  | complex | 11 |
| AT1G72950.1 |  | 1 |  |  | complex | 11 |
| AT2G03030.1 |  | 2 | MuDR Helitron | promoter | singleton | 1 |
| AT2G03300.1 |  | 2 | hAT  Helitron | promoter, terminator | singleton | 1 |
| AT2G14080.1 |  | 2 | Copia  LINE/L1 | promoter, intron | singleton | 1 |
| AT2G16870.1 |  | 2 | Helitron | terminator | singleton | 1 |
| AT2G17050.1 |  | 2 | Helitron | promoter, terminator | inverted | 2 |
| AT2G17060.1 |  | 2 | MuDR  Helitron | promoter | inverted | 2 |
| AT2G20142.1 |  | 2 | MuDR | terminator | singleton | 1 |
| AT2G32140.1 |  | 2 | Helitron | promoter, terminator | singleton | 1 |
| AT3G04210.1 |  | 3 |  |  | tandem | 2 |
| AT3G04220.1 |  | 3 |  |  | tandem | 2 |
| AT3G07040.1 | *RPM1* | 3 |  |  | singleton | 1 |
| AT3G14460.1 |  | 3 |  |  | inverted | 2 |
| AT3G14470.1 |  | 3 | MuDR | terminator | inverted | 2 |
| AT3G15700.1 |  | 3 |  |  | singleton | 1 |
| AT3G25510.1 |  | 3 |  |  | singleton | 1 |
| AT3G44400.1 |  | 3 | LINE/L1  Gypsy Helitron | promoter, terminator | tandem | 2 |
| AT3G44480.1 | *RPP1* | 3 | Helitron  Harbinger | terminator | tandem | 2 |
| AT3G44630.3 | *DM2* | 3 | Harbinger  MuDR Helitron | terminator | tandem | 2 |
| AT3G44670.1 |  | 3 | Helitron | terminator | tandem | 2 |
| AT3G46530.1 | *RPP13* | 3 |  |  | singleton | 1 |
| AT3G46710.1 |  | 3 | Helitron | promoter | tandem | 2 |
| AT3G46730.1 |  | 3 |  |  | tandem | 2 |
| AT3G50950.2 | *ZAR1* | 3 |  |  | singleton | 1 |
| AT3G51560.1 |  | 3 |  |  | inverted | 2 |
| AT3G51570.1 |  | 3 |  |  | inverted | 2 |
| AT4G04110.1 |  | 4 | Copia  EnSpm | promoter, terminator | singleton | 1 |
| AT4G08450.1 |  | 4 | Pogo  Helitron | intron | singleton | 1 |
| AT4G09360.1 |  | 4 | Helitron MuDR  Gypsy | promoter, terminator | tandem inverted | 3 |
| AT4G09420.1 |  | 4 | Helitron Mariner MuDR | promoter, terminator | tandem inverted | 3 |
| AT4G09430.1 |  | 4 | Copia  hAT | promoter, terminator | tandem inverted | 3 |
| AT4G10780.1 |  | 4 | Helitron  MuDR | promoter | singleton | 1 |
| AT4G11170.1 | *RMG1* | 4 | Helitron MuDR | promoter, intron | inverted | 2 |
| AT4G11340.1 |  | 4 | Helitron | promoter, intron | inverted | 2 |
| AT4G12010.1 |  | 4 |  |  | inverted | 2 |
| AT4G12020.2 |  | 4 | hAT | terminator | inverted | 2 |
| AT4G14370.1 |  | 4 |  |  | singleton | 1 |
| AT4G16860.1 | *RPP4* | 4 | Helitron | intron | complex | 8 |
| AT4G16890.1 | *SNC1* | 4 |  |  | complex | 8 |
| AT4G16900.1 |  | 4 |  |  | complex | 8 |
| AT4G16920.1 |  | 4 | Helitron | intron | complex | 8 |
| AT4G16940.1 |  | 4 |  |  | complex | 8 |
| AT4G16950.1 | *RPP5* | 4 |  |  | complex | 8 |
| AT4G16960.1 |  | 4 | Copia | intron | complex | 8 |
| AT4G16990.2 | *RLM3* | 4 | Helitron | intron, terminator | complex | 8 |
| AT4G19050.1 |  | 4 |  |  | tandem | 2 |
| AT4G19060.1 |  | 4 |  |  | tandem | 2 |
| AT4G19500.1 |  | 4 | Helitrons  MuDR | promoter, terminator | tandem inverted | 4 |
| AT4G19510.1 |  | 4 | Harbinger | promoter | tandem inverted | 4 |
| AT4G19520.1 |  | 4 | MuDR  SINE | promoter | tandem inverted | 4 |
| AT4G19530.1 |  | 4 | MuDR Helitron | promoter, intron | tandem inverted | 4 |
| AT4G19920.1 |  | 4 | Mariner | promoter | singleton | 1 |
| AT4G23440.1 |  | 4 |  |  | inverted | 2 |
| AT4G23510.1 |  | 4 | Copia | intron | inverted | 2 |
| AT4G26090.1 | *RPS2* | 4 | Helitron | promoter, terminator | singleton | 1 |
| AT4G27190.1 |  | 4 | Copia | promoter | tandem | 2 |
| AT4G27220.1 |  | 4 |  |  | tandem | 2 |
| AT4G33300.1 |  | 4 | Helitrons | intron | singleton | 1 |
| AT4G36140.1 |  | 4 |  |  | inverted | 2 |
| AT4G36150.1 |  | 4 |  |  | inverted | 2 |
| AT5G04720.1 |  | 5 |  |  | singleton | 1 |
| AT5G05400.1 |  | 5 |  |  | singleton | 1 |
| AT5G11250.1 |  | 5 |  |  | singleton | 1 |
| AT5G17680.1 |  | 5 |  |  | singleton | 1 |
| AT5G17880.1 |  | 5 | Helitron | promoter | tandem inverted | 3 |
| AT5G17890.1 |  | 5 | Helitron | promoter, terminator | tandem inverted | 3 |
| AT5G17970.1 |  | 5 |  |  | tandem inverted | 3 |
| AT5G18350.1 |  | 5 | Helitron | terminator | tandem | 3 |
| AT5G18360.1 |  | 5 |  |  | tandem | 3 |
| AT5G18370.1 |  | 5 |  |  | tandem | 3 |
| AT5G22690.1 |  | 5 |  |  | singleton | 1 |
| AT5G35450.1 |  | 5 |  |  | singleton | 1 |
| AT5G36930.2 |  | 5 | MuDR  LINE/L1 | promoter | singleton | 1 |
| AT5G38340.1 |  | 5 |  |  | tandem | 2 |
| AT5G38350.1 |  | 5 | MuDR | promoter | tandem | 2 |
| AT5G38850.1 |  | 5 |  |  | singleton | 1 |
| AT5G40060.1 |  | 5 |  |  | tandem inverted | 3 |
| AT5G40090.1 |  | 5 |  |  | tandem inverted | 3 |
| AT5G40100.1 |  | 5 | MuDR | terminator | tandem inverted | 3 |
| AT5G40910.1 |  | 5 |  |  | singleton | 1 |
| AT5G41540.1 |  | 5 |  |  | tandem | 2 |
| AT5G41550.1 | *DM1* | 5 |  |  | tandem | 2 |
| AT5G41740.2 | *DM1* | 5 |  |  | tandem | 2 |
| AT5G41750.1 |  | 5 | LINE/L1 | terminator | tandem | 2 |
| AT5G43470.1 | *RPP8* | 5 | Helitron | intron | singleton | 1 |
| AT5G43730.1 |  | 5 |  |  | tandem | 2 |
| AT5G43740.1 |  | 5 | Helitron | intron | tandem | 2 |
| AT5G44510.1 | *TAO1* | 5 |  |  | singleton | 1 |
| AT5G44870.1 | *TTR1* | 5 | Helitron  MuDR | promoter, terminator | complex | 10 |
| AT5G44900.1 |  | 5 |  |  | complex | 10 |
| AT5G44910.1 |  | 5 |  |  | complex | 10 |
| AT5G44920.1 |  | 5 |  |  | complex | 10 |
| AT5G45000.1 |  | 5 |  |  | complex | 10 |
| AT5G45050.1 | *RRS1B* | 5 |  |  | complex | 10 |
| AT5G45060.1 | *RPS4B* | 5 | MuDR | terminator | complex | 10 |
| AT5G45070.1 |  | 5 | MuDR | terminator | complex | 10 |
| AT5G45080.1 |  | 5 | Helitron | terminator | complex | 10 |
| AT5G45090.1 |  | 5 | MuDR  Copia  EnSpm | promoter, terminator | complex | 10 |
| AT5G45200.1 | *HRG7* | 5 | Helitron | intron | complex | 7 |
| AT5G45210.1 | *HRG8* | 5 |  |  | complex | 7 |
| AT5G45220.1 |  | 5 |  |  | complex | 7 |
| AT5G45230.1 |  | 5 | MuDR | intron | complex | 7 |
| AT5G45240.1 |  | 5 | Helitron | promoter | complex | 7 |
| AT5G45250.1 | *RPS4* | 5 |  |  | complex | 7 |
| AT5G45260.1 | *RRS1* | 5 | MuDR | intron | complex | 7 |
| AT5G45440.1 |  | 5 | MuDR | promoter | tandem inverted | 3 |
| AT5G45490.1 |  | 5 | Helitron | intron | tandem inverted | 3 |
| AT5G45510.1 |  | 5 | Helitron | promoter | tandem inverted | 3 |
| AT5G46260.1 | *HRG2* | 5 |  |  | tandem | 2 |
| AT5G46270.1 | *HRG3* | 5 |  |  | tandem | 2 |
| AT5G46450.1 |  | 5 |  |  | complex | 6 |
| AT5G46470.1 | *RPS6* | 5 |  |  | complex | 6 |
| AT5G46490.2 |  | 5 | Helitron | terminator | complex | 6 |
| AT5G46500.1 |  | 5 | Helitron | promoter | complex | 6 |
| AT5G46510.1 |  | 5 | Gypsy | promoter | complex | 6 |
| AT5G46520.1 |  | 5 |  |  | complex | 6 |
| AT5G47250.1 |  | 5 |  |  | tandem inverted | 3 |
| AT5G47260.1 |  | 5 | Helitron | terminator | tandem inverted | 3 |
| AT5G47280.1 |  | 5 | Helitron | promoter | tandem inverted | 3 |
| AT5G48620.1 |  | 5 | MuDR  Helitron | intron | singleton | 1 |
| AT5G48770.1 |  | 5 |  |  | inverted | 2 |
| AT5G48780.1 |  | 5 |  |  | inverted | 2 |
| AT5G49140.1 | *HRG9* | 5 | Helitron | intron | singleton | 1 |
| AT5G51630.1 |  | 5 | Harbinger | promoter | singleton | 1 |
| AT5G56220.1 |  | 5 |  |  | singleton | 1 |
| AT5G58120.1 |  | 5 | hAT | promoter | singleton | 1 |
| AT5G63020.1 |  | 5 |  |  | singleton | 1 |
| AT5G66630.1 |  | 5 |  |  | singleton | 1 |
| AT5G66900.1 |  | 5 |  |  | tandem | 2 |
| AT5G66910.1 |  | 5 |  |  | tandem | 2 |

**Supplemental Table S18. Oligonucleotide sequences.** Oligonucleotide sequences used for genotyping and library construction are listed. [phos] indicates a phosphorylated 5′ end, ddT indicates dideoxy-thymidine, [pp] indicates an inverted 3′-3′ linkage and * indicates a phosphorothioate bond. SPO11-1-oligonucleotide libraries RPI1 and RPI3 (wild type, Col) were generated using the following adapters: 3′-adapter (top=Spo11-3AD, bottom=Spo11-3AD) and 5′-adapter (top=Spo11-5AD, bottom Spo11-5AD). All other SPO11-1-oligonucleotide libraries were constructed by using the following adapters: 3′-adapter (top=Spo11-3AD, bottom=Spo11-3AD bot-1) and 5′-adapter mixture (top=Spo11-5AD top-1,-2,-3,-4, bottom Spo11-5AD bot-1,-2,-3,-4). Using a mixture of 5′-adapters with variable nucleotides prevents low diversity sequencing problems caused by G-tailing of SPO11-1-oligonucleotides during library construction.

| Name | Sequence |
| --- | --- |
| myc-HB-F | 5'-GGGGAAGCTTGGATCCAACTCGAGGGCGCGCCTGTA-3' |
| myc-BglII-R | 5'-GGGGAGATCTTCATCGATTTCGAACCCGGGGTAC-3' |
| SPO11-1-BamHI-F | 5'-GGATCCTGACTAAGTATGAGACCTCT-3' |
| SPO11-1-BamHI-R | 5'-GGATCCCAGGAGAGCTTACTTCACGAC-3' |
| SALK-LBb1 | 5'-GCGTGGACCGCTTGCTGCAACT-3 |
| SALK172-R | 5'­-CCACAACCAGTATGTACTCAGCTAAGCTAAC-3' |
| KC286 | 5'-AGGGGTCAAGTTTGAGATCG-3' |
| KC313 | 5'-GTTGGAGACTAGTTATCTCG-3' |
| KC314 | 5'-GTAGTCGGTACAACTTGAATG-3' |
| SAIL_LB3 | 5'-TAGCATCTGAATTTCATAACCAATCTCGATACAC-3' |
| KC638 | 5'-ACATTCTTGTGATCAACTGTGTA-3' |
| KC694 | 5'-GTTCTTTTCATCGTGACTTATTCCC-3' |
| Spo11-3AD top | 5'-[phos]TGGAATTCTCGGGTGCCAAGGCddT-3' |
| Spo11-5AD bot | 5'-[phos]AAGTCGATCGTCGGACTGTAGAACTCTGAACTddT-3' |
| Spo11-3AD bot | 5'-GCCTTGGCACCCGAGAATTCCACCC-3' |
| Spo11-5AD top | 5'-AGTTCAGAGTTCTACAGTCCGACGATCCCC-3' |
| Spo11-3AD top-1 | 5'-[phos]TGGAATTCTCGGGTGCCAAGGC[pp]T-3' |
| Spo11-5AD bot-1 | 5'-[phos]AAGTCGATCGTCGGACTGTAGAACTCTGAACT[pp]T-3’ |
| Spo11-5AD bot-2 | 5'-[phos]AGTCAGATCGTCGGACTGTAGAACTCTGAACT[pp]T-3’ |
| Spo11-5AD bot-3 | 5'-[phos]ATCAGGATCGTCGGACTGTAGAACTCTGAACT[pp]T-3' |
| Spo11-5AD bot-4 | 5'-[phos]ACAGTGATCGTCGGACTGTAGAACTCTGAACT[pp]T-3' |
| Spo11-3AD bot-1 | 5'-GCCTTGGCACCCGAGAATTCCACCCC-3' |
| Spo11-5AD top-1 | 5'-AGTTCAGAGTTCTACAGTCCGACGATCGACTTCCCC-3' |
| Spo11-5AD top-2 | 5'-AGTTCAGAGTTCTACAGTCCGACGATCTGACTCCCC-3' |
| Spo11-5AD top-3 | 5'-AGTTCAGAGTTCTACAGTCCGACGATCCTGATCCCC-3' |
| Spo11-5AD top-4 | 5'-AGTTCAGAGTTCTACAGTCCGACGATCACTGTCCCC-3' |
| RPI1 | 5'-CAACGAGAAGACGGCATACGAGATCGTGATGTGACTGGAGTTCCTTGGCACCCGAGAATTCC*A-3' |
| RPI3 | 5'-CAAGCAGAAGACGGCATACGAGATGCCTAAGTGACTGGAGTTCCTTGGCACCCGAGAATTCC*A-3' |
| RPI8 | 5'-CAAGCAGAAGACGGCATACGAGATTCAAGTGTGACTGGAGTTCCTTGGCACCCGAGAATTCC*A-3' |
| RPI45 | 5'-CAAGCAGAAGACGGCATACGAGATGAATGAGTGACTGGAGTTCCTTGGCACCCGAGAATTCC*A-3' |
| RPI46 | 5'-CAAGCAGAAGACGGCATACGAGATTCGGGAGTGACTGGAGTTCCTTGGCACCCGAGAATTCC*A-3' |
| RPI48 | 5'-CAAGCAGAAGACGGCATACGAGATTGCCGAGTGACTGGAGTTCCTTGGCACCCGAGAATTCC*A-3' |
| RP1 | 5'- AATGATACGGCGACCACCGAGATCTACACGTTCAGAGTTCTACAGTCCG*A-3' |

**Supplemental Figure S1. Association of SPO11-1-Myc foci with the meiotic chromosome axis at leptotene.** Representative images of immunostained nuclei from pollen mother cells of *SPO11-1-Myc spo11-1* at mid-leptotene stage (image from Fig. 1A). Scale bars indicate 10 μM. The dashed inset boxes indicate the blown-up regions beneath.

**Supplemental Figure S2. Purification, sequencing and analysis of *Arabidopsis* SPO11-1-oligonucleotides.** A diagrammatic workflow is shown for the purification, sequencing and analysis of *Arabidopsis* SPO11-1-oligonucleotides. Further details are provided in the Supplemental Methods.

**Supplemental Figure S3. Purification and end-labeling of SPO11-1-oligos in *SPO11-1-Myc spo11-1* compared with wild type and *prd2* mutants. (A)** α-Myc western blotting from Col, *SPO11-1-Myc spo11-1* or *SPO11-1-Myc prd2* extracts after α-Myc immunoprecipitation (α-Myc-IP). A Coomassie stained gel is shown for the same extracts (lower). **(B)** Detection of radiolabeled SPO11-1-oligos from Col, *SPO11-1-Myc spo11-1* or *SPO11-1-Myc prd2* following proteinase K digestion of immunoprecipitates and polyacrylamide gel electrophoresis (PAGE). **(C)** Ethidium bromide stained gel showing the amplified final SPO11-1-oligo library obtained by immunoprecipitation from *SPO11-1-Myc* extracts with (+) and without (-) α-Myc immunoprecipitation.

**Supplemental Figure S4.** **Correlation of SPO11-1-oligo libraries between genotype replicates. (A)** Scatter plots showing Spearman’s rank correlation of library size normalized SPO11-1-oligos values calculated in adjacent 10 kb windows between the indicated wild type (*SPO11-1-Myc spo11-1*) libraries RPI1, RPI3 and RPI8 (Supplemental Table S2). The blue dotted lines indicate genome average values. The solid red line indicates a linear relationship. The correlation coefficient (*r*) is printed above the plots. **(B)** As for (A), but plotting the *SPO11-1-Myc met1-3* libraries RPI45, RPI46 and RPI48. **(C)** Histograms of library size normalized SPO11-1-oligos from biological replicate wild type libraries RPI1, RPI3 and RPI8 (blue), nucleosomes (green, MNase-seq) and H3K4me3 (purple, ChIP-seq). TAIR10 representative gene (blue) models and transposons (red) are plotted in the lower panel.

**Supplemental Figure S5. Analysis of SPO11-1-oligo following duplicated read filtering and varying methods for assigning multiply mapped reads. (A)** Library size normalized coverage values are plotted along chromosome 1 in 10 kb windows for wild type library RPI8 (left) and­ *met1* library RPI46 (right). The upper and lower plots show coverage before and after removal of duplicate reads (+rmdup). The position of the centromere is indicated by the vertical dotted line. **(B)** Library size normalized coverage plotted for libraries RPI8 and RPI46 calculated in adjacent 10 kb windows and after smoothing by application of a rolling mean calculation. The plots represent values following assignment of multiple aligning reads using ‘Best match’ (black), ‘Fractional’ (red) or ‘CSEM’ (blue) methods. **(C)** Kernel density (probability density) plots showing library size normalized SPO11-1-oligos in the indicated transposon families and genes according to method of multiply aligning read assignment as in (B). Mean values are indicated by the dotted lines.

**Supplemental Figure S6. Overlap of SPO11-1-oligo hotspots and genome features.** Each histogram shows the relative frequency distribution of 10,000 sets of permuted (randomly positioned) loci, which are of the same number and widths as the SPO11-1-oligo hotspots, with regard to the number of permuted loci that overlap one or more loci within the indicated category of genome feature (gray bars). The number of SPO11-1-oligo hotspots observed (green vertical line), or expected (black vertical line; mean overlaps for permuted loci) to overlap one or more loci, together with the significance threshold (red vertical line; α = 0.05) for a difference between observed and expected overlaps, are indicated. Permutation tests were performed using the regioneR R package.

**Supplemental Figure S7. Fine-scale analysis of SPO11-1-oligos, nucleosomes, H3K4me3 and transcription in wild type and *met1*,around the *3a* and *3b* crossover hotspots. (A)** Crossover frequency (cM/Mb) within the *3a* and *3b* crossover hotspots, reproduced from (Choi et al., 2013; Yelina et al., 2012, 2015). The gray vertical lines indicate the boundaries of the pollen-typing amplicons. Col/Ler SNPs are indicated by red ticks on the x-axis and gene positions are indicated by arrows. **(B)** Histograms of library size normalized SPO11-1-oligos, nucleosomes (MNase-seq), H3K4me3 (ChIP-seq) and mRNA (RNA-seq) in wild type (Col, blue) and *met1-3* (red). Histograms of % DNA methylation in CG (blue), CHG (green) and CHH (red) sequence contexts are also shown from published data (Stroud et al., 2013). TAIR10 representative gene models (blue) and transposons (red) are plotted in the lower panel. The positions of the *3a* and *3b* pollen-typing amplicons are indicated by gray shading.

**Supplemental Figure S8. Fine-scale analysis of SPO11-1-oligos, nucleosomes, H3K4me3 and transcription in wild type and *met1*,around the *14a* crossover hotspots. (A)** Histograms of library size normalized SPO11-1-oligos, nucleosomes (MNase-seq), H3K4me3 (ChIP-seq) and mRNA (RNA-seq) in wild type (Col, blue) and *met1-3* (red). Histograms of % DNA methylation in CG (blue), CHG (green) and CHH (red) sequence contexts are also shown from published data (Stroud et al., 2013). TAIR10 representative gene (blue) models and transposons (red) are plotted in the lower panel. The positions of the *14a* pollen-typing amplicon is indicated by gray shading. **(B)** Crossover frequency (cM/Mb) within the *14a* hotspots is shown underneath and reproduced from (Drouaud et al., 2013).

**Supplemental Figure S9. Fine-scale analysis of SPO11-1-oligos, nucleosomes, H3K4me3 and transcription in wild type and *met1*,across the *130x* crossover hotspot. (A)** Histograms of library size normalized SPO11-1-oligos, nucleosomes (MNase-seq), H3K4me3 (ChIP-seq) and mRNA (RNA-seq) in wild type (Col, blue) and *met1-3* (red). Histograms of % DNA methylation in CG (blue), CHG (green) and CHH (red) sequence contexts are also shown from published data (Stroud et al., 2013). TAIR10 representative gene (blue) models and transposons (red) are plotted in the lower panel. The positions of the *130x* pollen-typing amplicon is indicated by gray shading. **(B)** Crossover frequency (cM/Mb) across the *130x* hotspot is shown underneath and reproduced from (Drouaud et al., 2013).

**Supplemental Figure S10. Fine-scale analysis of SPO11-1-oligos, nucleosomes, H3K4me3 and transcription in wild type and *met1*,across the *RAC1* crossover hotspot. (A)** Crossover frequency (cM/Mb) within the *RAC1* crossover hotspot, reproduced from (Choi et al., 2016). The blue vertical lines indicate the boundaries of the pollen-typing amplicons. Col/Ler SNPs are indicated by red ticks on the x-axis and gene positions are indicated by arrows above the plot. Exon positions are indicated by horizontal lines at the top of the plot. **(B)** Histograms of library size normalized SPO11-1-oligos, nucleosomes (MNase-seq), H3K4me3 (ChIP-seq) and mRNA (RNA-seq) in wild type (Col, blue) and *met1-3* (red). Histograms of % DNA methylation in CG (blue), CHG (green) and CHH (red) sequence contexts are also shown from published data (Stroud et al., 2013). TAIR10 representative gene models (blue) and transposons (red) are plotted in the lower panel. The positions of the *RAC1* and *GDSL* genes are indicated by gray shading.

**Supplemental Figure S11. Fine-scale analysis of SPO11-1-oligos, nucleosomes, H3K4me3 and transcription in wild type and *met1*,across the *HRG1* crossover hotspot. (A)** Crossover frequency (cM/Mb) within the *HRG1* crossover hotspot, reproduced from (Choi et al., 2016). Gene positions are indicated by arrows at the bottom of the plot. The arrow corresponding to *HRG1* is highlighted in red. **(B)** Histograms of library size normalized SPO11-1-oligos, nucleosomes (MNase-seq), H3K4me3 (ChIP-seq) and mRNA (RNA-seq) in wild type (Col, blue) and *met1-3* (red). Histograms of % DNA methylation in CG (blue), CHG (green) and CHH (red) sequence contexts are also shown from published data (Stroud et al., 2013). TAIR10 representative gene models (blue) and transposons (red) are plotted in the lower panel. The positions of the *HRG1* gene is indicated by gray shading.

**Supplemental Figure S12. Fine-scale analysis of SPO11-1-oligos, nucleosomes, H3K4me3 and transcription in wild type and *met1*,across the *HRG2* and *HRG3* crossover hotspots. (A)** Crossover frequency (cM/Mb) within the *HRG2* and *HRG3* crossover hotspots, reproduced from (Choi et al., 2016). Gene positions are indicated by arrows at the bottom of the plot. The arrows corresponding to *HRG2* and *HRG3* are highlighted in red. **(B)** Histograms of library size normalized SPO11-1-oligos, nucleosomes (MNase-seq), H3K4me3 (ChIP-seq) and mRNA (RNA-seq) in wild type (Col, blue) and *met1-3* (red). Histograms of % DNA methylation in CG (blue), CHG (green) and CHH (red) sequence contexts are also shown from published data (Stroud et al., 2013). TAIR10 representative gene models (blue) and transposons (red) are plotted in the lower panel. The positions of the *HRG2* and *HRG3* genes are indicated by gray shading.

**Supplemental Figure S13. Fine-scale analysis of SPO11-1-oligos, nucleosomes, H3K4me3 and transcription in wild type and *met1*,across the *HRG9* crossover hotspot. (A)** Crossover frequency (cM/Mb) across the *HRG9* crossover hotspot, reproduced from (Choi et al., 2016). Gene positions are indicated by arrows at the bottom of the plot. The arrow corresponding to *HRG9* is highlighted in red. **(B)** Histograms of library size normalized SPO11-1-oligos, nucleosomes (MNase-seq), H3K4me3 (ChIP-seq) and mRNA (RNA-seq) in wild type (Col, blue) and *met1-3* (red). Histograms of % DNA methylation in CG (blue), CHG (green) and CHH (red) sequence contexts are also shown from published data (Stroud et al., 2013). TAIR10 representative gene models (blue) and transposons (red) are plotted in the lower panel. The position of the *HRG9* gene is indicated by gray shading.

**Supplemental Figure S14. Fine-scale analysis of SPO11-1-oligos, nucleosomes, H3K4me3 and transcription in wild type and *met1*,across the *CW9* crossover hotspot. (A)** Crossover frequency (cM/Mb) across the *CW9* crossover hotspot, reproduced from (Choi et al., 2016). Gene positions are indicated by arrows at the bottom of the plot. The arrow corresponding to *CW9* is highlighted in red. **(B)** Histograms of library size normalized SPO11-1-oligos, nucleosomes (MNase-seq), H3K4me3 (ChIP-seq) and mRNA (RNA-seq) in wild type (Col, blue) and *met1-3* (red). Histograms of % DNA methylation in CG (blue), CHG (green) and CHH (red) sequence contexts are also shown from published data (Stroud et al., 2013). TAIR10 representative gene models (blue) and transposons (red) are plotted in the lower panel. The position of the *CW9* gene is indicated by gray shading.

**Supplemental Figure S15. Fine-scale analysis of SPO11-1-oligos, nucleosomes, H3K4me3 and transcription in wild type and *met1*,across the *HRG6* crossover hotspot. (A)** Crossover frequency (cM/Mb) across the *HRG6* crossover hotspot, reproduced from (Choi et al., 2016). Gene positions are indicated by arrows at the bottom of the plot. The arrow corresponding to *HRG6* is highlighted in red. **(B)** Histograms of library size normalized SPO11-1-oligos, nucleosomes (MNase-seq), H3K4me3 (ChIP-seq) and mRNA (RNA-seq) in wild type (Col, blue) and *met1-3* (red). Histograms of % DNA methylation in CG (blue), CHG (green) and CHH (red) sequence contexts are also shown from published data (Stroud et al., 2013). TAIR10 representative gene models (blue) and transposons (red) are plotted in the lower panel. The position of the *HRG6* gene is indicated by gray shading.

**Supplemental Figure S16. Fine-scale analysis of SPO11-1-oligos, nucleosomes, H3K4me3 and transcription in wild type and *met1*,across the *HRG7* and *HRG8* crossover hotspots. (A)** Crossover frequency (cM/Mb) across the *HRG7* and *HRG8* crossover hotspots, reproduced from (Choi et al., 2016). Gene positions are indicated by arrows at the bottom of the plot. The arrows corresponding to *HRG7* and *HRG8* are highlighted in red. Also indicated by red arrows are the resistance genes *RPS4* and *RRS1*. **(B)** Histograms of library size normalized SPO11-1-oligos, nucleosomes (MNase-seq), H3K4me3 (ChIP-seq) and mRNA (RNA-seq) in wild type (Col, blue) and *met1-3* (red). Histograms of % DNA methylation in CG (blue), CHG (green) and CHH (red) sequence contexts are also shown from published data (Stroud et al., 2013). TAIR10 representative gene models (blue) and transposons (red) are plotted in the lower panel. The positions of the *HRG7*, *HRG8*, *RPS4* and *RRS1* genes are indicated by gray shading.

**Supplemental Figure S17. Fine-scale analysis of SPO11-1-oligos, nucleosomes, H3K4me3 and transcription in wild type and *met1*,across the *HRG4* and *HRG5* crossover hotspots. (A)** Crossover frequency (cM/Mb) across the *HRG4* and *HRG5* crossover hotspots, reproduced from (Choi et al., 2016). Gene positions are indicated by arrows at the bottom of the plot. The arrows corresponding to *HRG4* and *HRG5* are highlighted in red. **(B)** Histograms of library size normalized SPO11-1-oligos, nucleosomes (MNase-seq), H3K4me3 (ChIP-seq) and mRNA (RNA-seq) in wild type (Col, blue) and *met1-3* (red). Histograms of % DNA methylation in CG (blue), CHG (green) and CHH (red) sequence contexts are also shown from published data (Stroud et al., 2013). TAIR10 representative gene models (blue) and transposons (red) are plotted in the lower panel. The positions of the *HRG4* and *HRG5* genes are indicated by gray shading.

**Supplemental Figure S18. Fine-scale analysis of SPO11-1-oligos, nucleosomes, H3K4me3 and transcription in wild type and *met1*,across the *WRR4* crossover hotspot. (A)** Crossover frequency (cM/Mb) across the *WRR4* crossover hotspot, reproduced from (Choi et al., 2016). Gene positions are indicated by arrows at the bottom of the plot. The arrows corresponding to *WRR4* and adjacent TIR-NBS-LRR genesare highlighted in red. **(B)** Histograms of library size normalized SPO11-1-oligos, nucleosomes (MNase-seq), H3K4me3 (ChIP-seq) and mRNA (RNA-seq) in wild type (Col, blue) and *met1-3* (red). Histograms of % DNA methylation in CG (blue), CHG (green) and CHH (red) sequence contexts are also shown from published data (Stroud et al., 2013). TAIR10 representative gene models (blue) and transposons (red) are plotted in the lower panel. The positions of the *WRR4* and adjacent TIR-NBS-LRRgenes are indicated by gray shading.

**Supplemental Figure S19. SPO11-1-oligonucleotides and chromatin within *Arabidopsis* introns and exons. (A)** SPO11-1-oligonucleotide (z-score standardized log2(SPO11-1-oligo/gDNA)) levels in exons (black) or introns (red) at increasing positions from transcriptional start sites (TSS). **(B)** As for (A), but analyzing nucleosome occupancy (z-score standardized log2(MNase-seq/gDNA)). **(C)** As for (A), but analyzing H3K4me3 (z-score transformed log2(ChIP/Input)).

**Supplemental Figure S20. Fine-scale analysis of SPO11-1-oligos, nucleosomes, H3K4me3 and transcription in wild type and *met1*,across *ATCOPIA4* and *HELITRON* transposons.** Histograms of library size normalized SPO11-1-oligos, nucleosomes (MNase-seq), H3K4me3 (ChIP-seq) and mRNA (RNA-seq) in wild type (Col, blue) and *met1-3* (red). Histograms of % DNA methylation in CG (blue), CHG (green) and CHH (red) sequence contexts are also shown from published data (Stroud et al., 2013). TAIR10 representative gene models (blue) and transposons (red) are plotted in the lower panel. The positions of the *ATCOPIA4* retrotransposon and an adjacent cluster of helitron (*ATREP10A, ATERP2, ATREP10C, ATREP4, HELITRONY3, ATREP3*) fragments are indicated by gray shading.

**Supplemental Figure S21. Fine-scale analysis of SPO11-1-oligos, nucleosomes, H3K4me3 and transcription in wild type and *met1*,across *HELITRONY1A* and *ATREP11* helitron transposons.** Histograms of library size normalized SPO11-1-oligos, nucleosomes (MNase-seq), H3K4me3 (ChIP-seq) and mRNA (RNA-seq) in wild type (Col, blue) and *met1-3* (red). Histograms of % DNA methylation in CG (blue), CHG (green) and CHH (red) sequence contexts are also shown from published data (Stroud et al., 2013). TAIR10 representative gene models (blue) and transposons (red) are plotted in the lower panel. The positions of intergenic *HELITRONY1A* and *ATREP11* are indicated by gray shading.

**Supplemental Figure S22. Fine-scale analysis of SPO11-1-oligos, nucleosomes, H3K4me3 and transcription in wild type and *met1*,across the *ATHPOGON1* transposon.** Histograms of library size normalized SPO11-1-oligos, nucleosomes (MNase-seq), H3K4me3 (ChIP-seq) and mRNA (RNA-seq) in wild type (Col, blue) and *met1-3* (red). Histograms of % DNA methylation in CG (blue), CHG (green) and CHH (red) sequence contexts are also shown from published data (Stroud et al., 2013). TAIR10 representative gene models (blue) and transposons (red) are plotted in the lower panel. The position of the full length *ATHPOGON1* Tc1/Pogo/Mariner class transposonis indicated by gray shading, in addition to an adjacent cluster of helitron transposon fragments.

**Supplemental Figure S23. Fine-scale analysis of SPO11-1-oligos, nucleosomes, H3K4me3 and transcription in wild type and *met1*,across the *Lemi1* transposon.** Histograms of library size normalized SPO11-1-oligos, nucleosomes (MNase-seq), H3K4me3 (ChIP-seq) and mRNA (RNA-seq) in wild type (Col, blue) and *met1-3* (red). Histograms of % DNA methylation in CG (blue), CHG (green) and CHH (red) sequence contexts are also shown from published data (Stroud et al., 2013). TAIR10 representative gene models (blue) and transposons (red) are plotted in the lower panel. The position of the full length *Lemi1* transposonis indicated by gray shading, in addition to an adjacent *ATREP15* helitron transposon fragment.

**Supplemental Figure S24. Fine-scale analysis of SPO11-1-oligos, nucleosomes, H3K4me3 and transcription in wild type and *met1*,across the *HELITRON1* transposon.** Histograms of library size normalized SPO11-1-oligos, nucleosomes (MNase-seq), H3K4me3 (ChIP-seq) and mRNA (RNA-seq) in wild type (Col, blue) and *met1-3* (red). Histograms of % DNA methylation in CG (blue), CHG (green) and CHH (red) sequence contexts are also shown from published data (Stroud et al., 2013). TAIR10 representative gene models (blue) and transposons (red) are plotted in the lower panel. The position of the full length *HELITRON1* transposonis indicated by gray shading.

**Supplemental Figure S25. Fine-scale analysis of SPO11-1-oligos, nucleosomes, H3K4me3 and transcription in wild type and *met1*,across the *HELITRON4* transposon.** Histograms of library size normalized SPO11-1-oligos, nucleosomes (MNase-seq), H3K4me3 (ChIP-seq) and mRNA (RNA-seq) in wild type (Col, blue) and *met1-3* (red). Histograms of % DNA methylation in CG (blue), CHG (green) and CHH (red) sequence contexts are also shown from published data (Stroud et al., 2013). TAIR10 representative gene models (blue) and transposons (red) are plotted in the lower panel. The position of the full length *HELITRON4* transposonis indicated by gray shading.

**Supplemental Figure S26. Fine-scale analysis of SPO11-1-oligos, nucleosomes, H3K4me3 and transcription in wild type and *met1*,across a *DEFENSIN* cluster.** Histograms of library size normalized SPO11-1-oligos, nucleosomes (MNase-seq), H3K4me3 (ChIP-seq) and mRNA (RNA-seq) in wild type (Col, blue) and *met1-3* (red). Histograms of % DNA methylation in CG (blue), CHG (green) and CHH (red) sequence contexts are also shown from published data (Stroud et al., 2013). TAIR10 representative gene models (blue) and transposons (red) are plotted in the lower panel. The positions of a cluster of *DEFENSIN* genes located on chromosome 3 is indicated by gray shading.

**Supplemental Figure S27. Fine-scale analysis of SPO11-1-oligos, nucleosomes, H3K4me3 and transcription in wild type and *met1*,across a *DEFENSIN* cluster.** Histograms of library size normalized SPO11-1-oligos, nucleosomes (MNase-seq), H3K4me3 (ChIP-seq) and mRNA (RNA-seq) in wild type (Col, blue) and *met1-3* (red). Histograms of % DNA methylation in CG (blue), CHG (green) and CHH (red) sequence contexts are also shown from published data (Stroud et al., 2013). TAIR10 representative gene models (blue) and transposons (red) are plotted in the lower panel. The positions of a cluster of *DEFENSIN* genes located on chromosome 5 is indicated by gray shading.

**Supplemental Figure S28. Fine-scale analysis of SPO11-1-oligos, nucleosomes, H3K4me3 and transcription in wild type and *met1*,across the *RPP4-SNC1* disease resistance gene cluster.** Histograms of library size normalized SPO11-1-oligos, nucleosomes (MNase-seq), H3K4me3 (ChIP-seq) and mRNA (RNA-seq) in wild type (Col, blue) and *met1-3* (red). Histograms of % DNA methylation in CG (blue), CHG (green) and CHH (red) sequence contexts are also shown from published data (Stroud et al., 2013). TAIR10 representative gene models (blue) and transposons (red) are plotted in the lower panel. The positions of the resistancegenes *RPP4* and *SNC1* are indicated by gray shading.

**Supplemental Figure S29. Fine-scale analysis of SPO11-1-oligos, nucleosomes, H3K4me3 and transcription in wild type and *met1*,across *ATENSPM9* and *ATGP3*.** Histograms of library size normalized SPO11-1-oligos, nucleosomes (MNase-seq), H3K4me3 (ChIP-seq) and mRNA (RNA-seq) in wild type (Col, blue) and *met1-3* (red). Histograms of % DNA methylation in CG (blue), CHG (green) and CHH (red) sequence contexts are also shown from published data (Stroud et al., 2013). TAIR10 representative gene models (blue) and transposons (red) are plotted in the lower panel. The positions of the *ATENSPM9* and *ATGP3* transposonsare indicated by gray shading.

**Supplemental Figure S30. Fine-scale analysis of SPO11-1-oligos, nucleosomes, H3K4me3 and transcription in wild type and *met1*,across *HELITRON5* and *ATENSPM10*.** Histograms of library size normalized SPO11-1-oligos, nucleosomes (MNase-seq), H3K4me3 (ChIP-seq) and mRNA (RNA-seq) in wild type (Col, blue) and *met1-3* (red). Histograms of % DNA methylation in CG (blue), CHG (green) and CHH (red) sequence contexts are also shown from published data (Stroud et al., 2013). TAIR10 representative gene models (blue) and transposons (red) are plotted in the lower panel. The positions of the *HELITRON5* and *ATENSPM10* transposonsare indicated by gray shading.

**Supplemental Figure S31. Fine-scale analysis of SPO11-1-oligos, nucleosomes, H3K4me3 and transcription in wild type and *met1*,across *ATGP5* and *ATENSPM9*.** Histograms of library size normalized SPO11-1-oligos, nucleosomes (MNase-seq), H3K4me3 (ChIP-seq) and mRNA (RNA-seq) in wild type (Col, blue) and *met1-3* (red). Histograms of % DNA methylation in CG (blue), CHG (green) and CHH (red) sequence contexts are also shown from published data (Stroud et al., 2013). TAIR10 representative gene models (blue) and transposons (red) are plotted in the lower panel. The positions of the *ATENSPM9* and *ATGP5* transposonsare indicated by gray shading.
